# Supplementary material for: Germline variants associated with immunotherapy-related adverse events
Source: bioRxiv or medRxiv preprint supplement (doi:10.1101/2022.04.10.22273627), 2022-04-15
Supplement: Supplementary file [file media-1.pdf]

## **Supplemental Material**

Figure S1

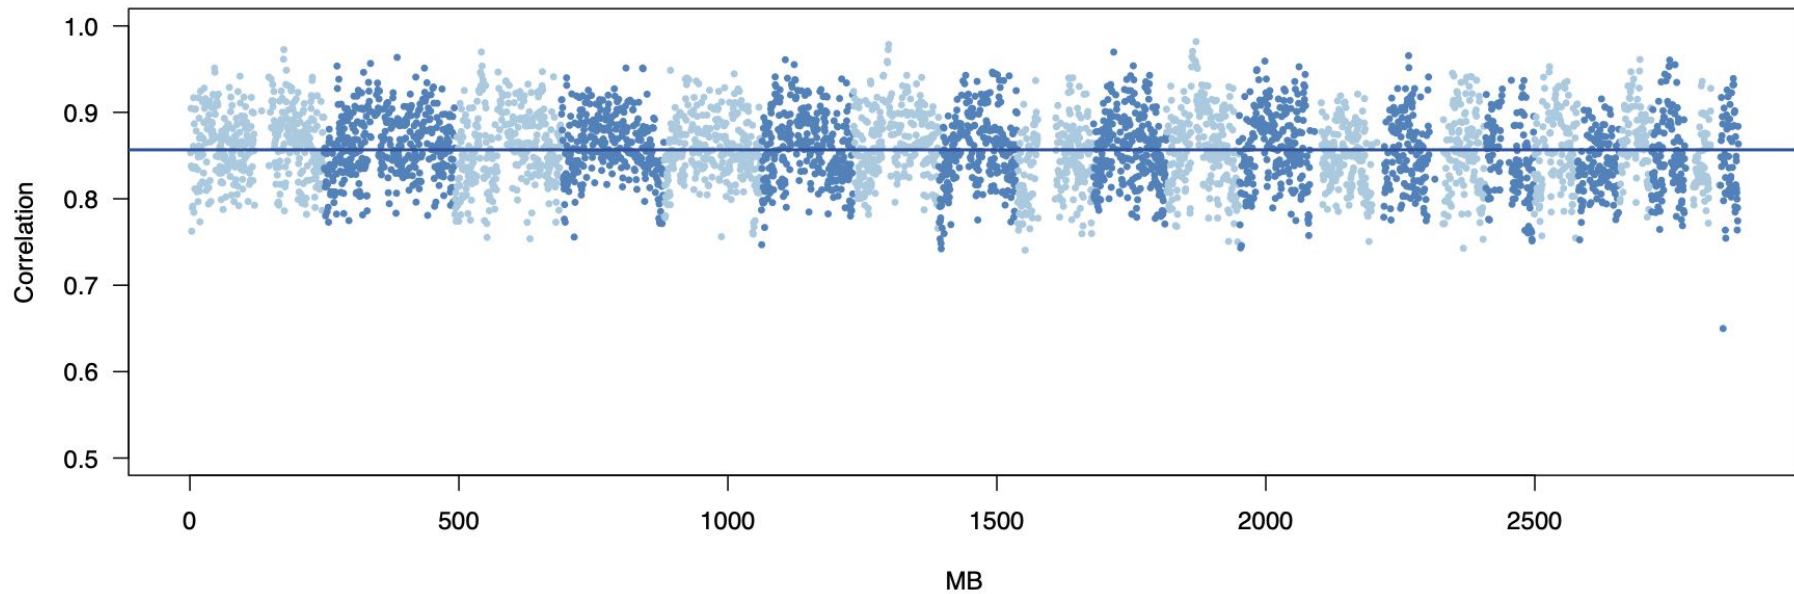

Figure S2

a. High-grade irAEs

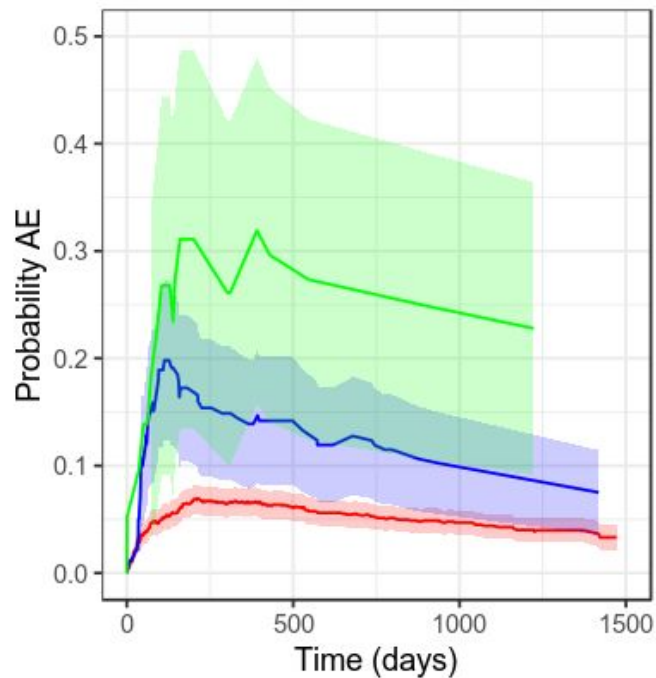

b. All-grade irAEs

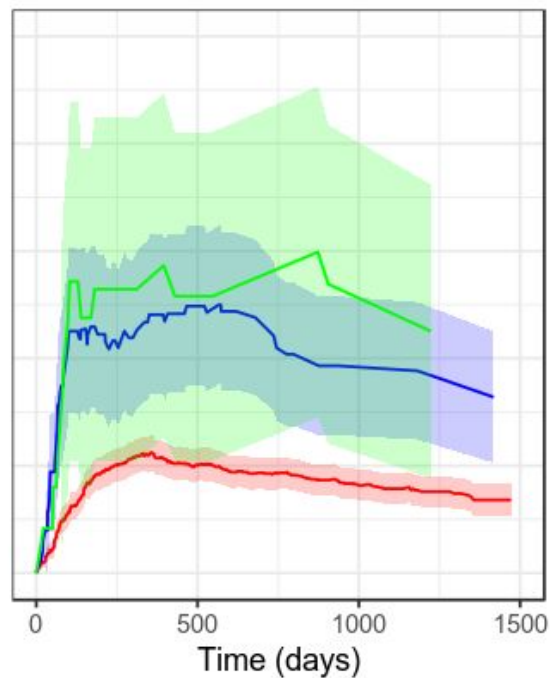

Treatment — CTLA4 — Combination therapy — PD1/PD-L1

Figure S3

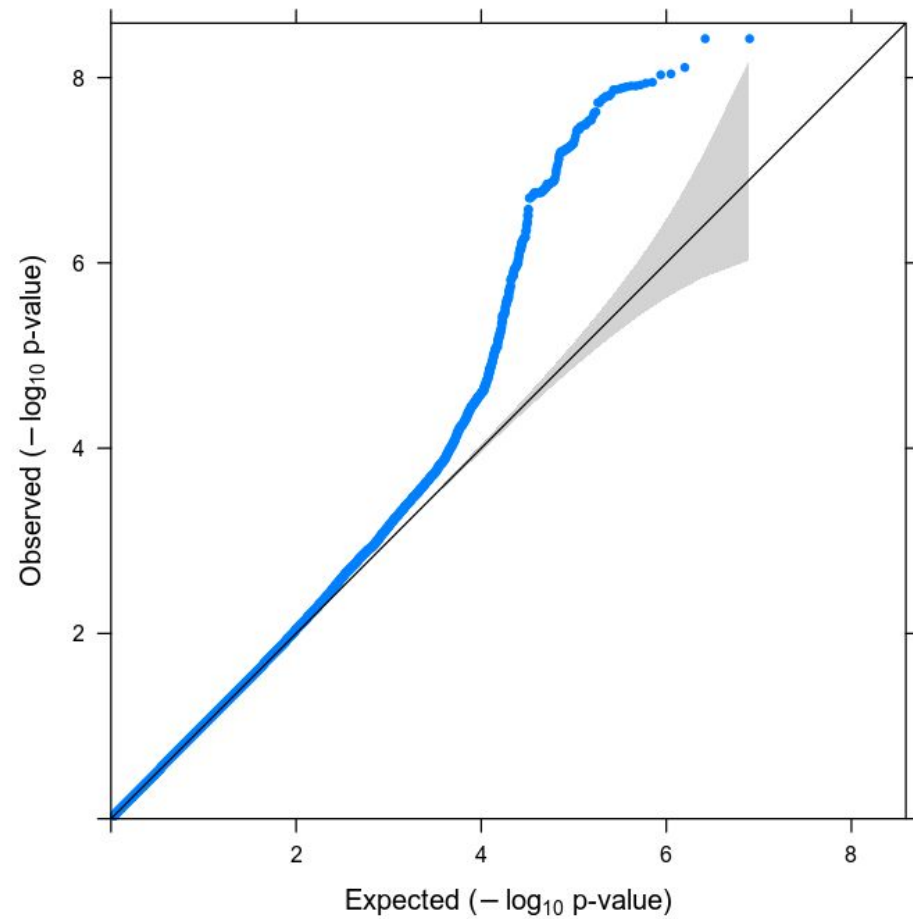

# Figure S4

**a.**

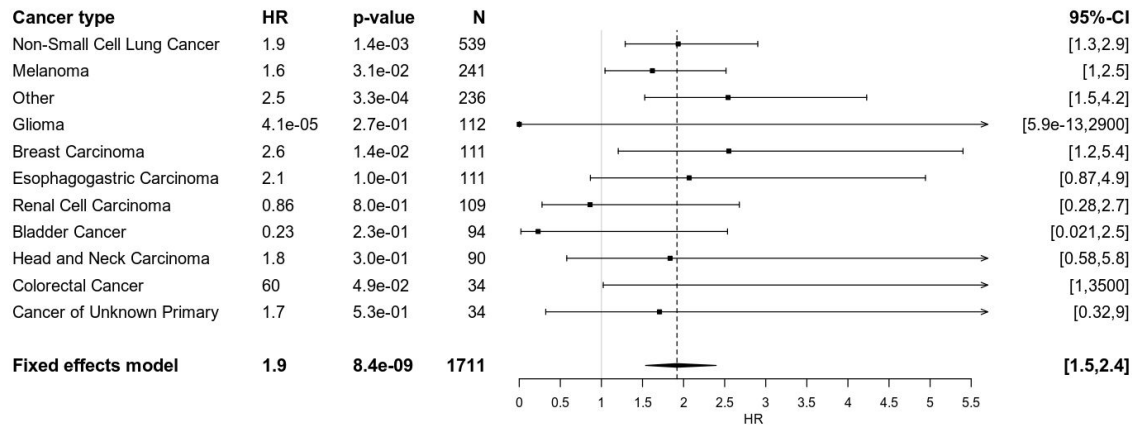

**b.**

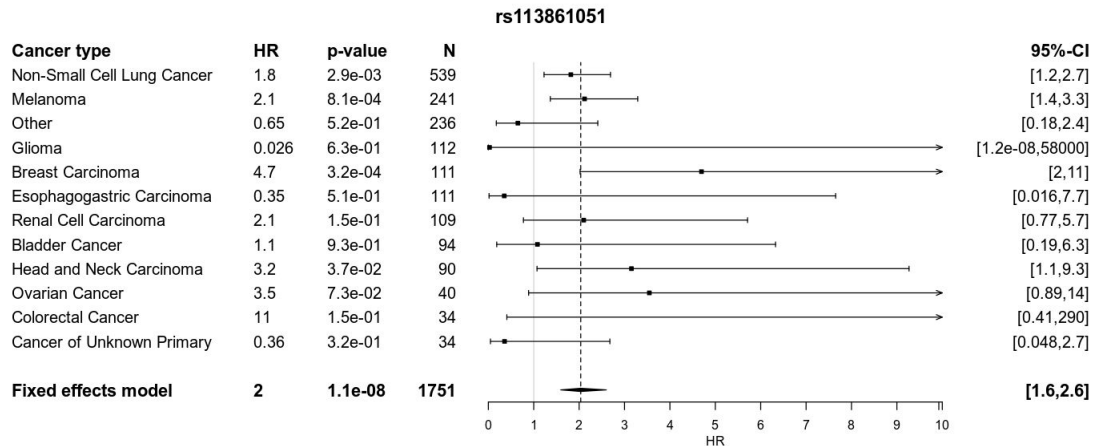

# Figure S5

**a.**

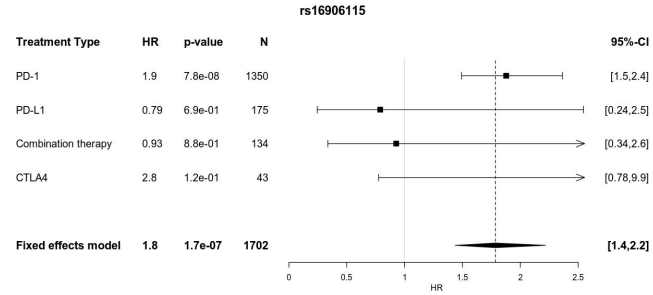

**b.**

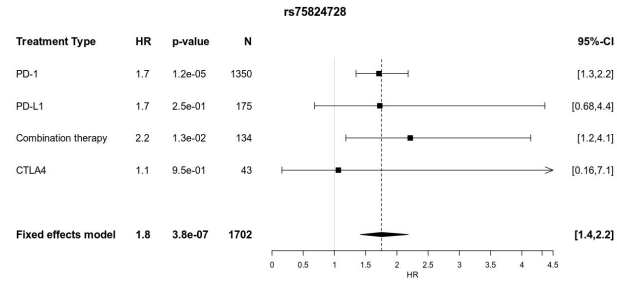

**c.**

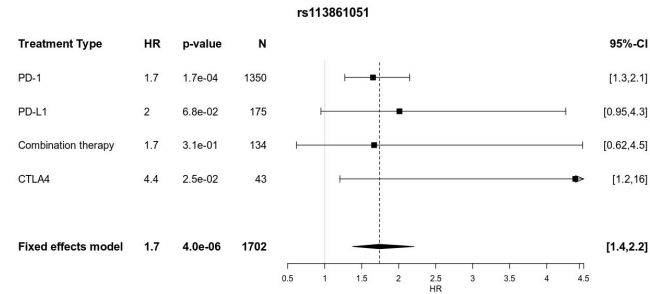

# Figure S6

a.

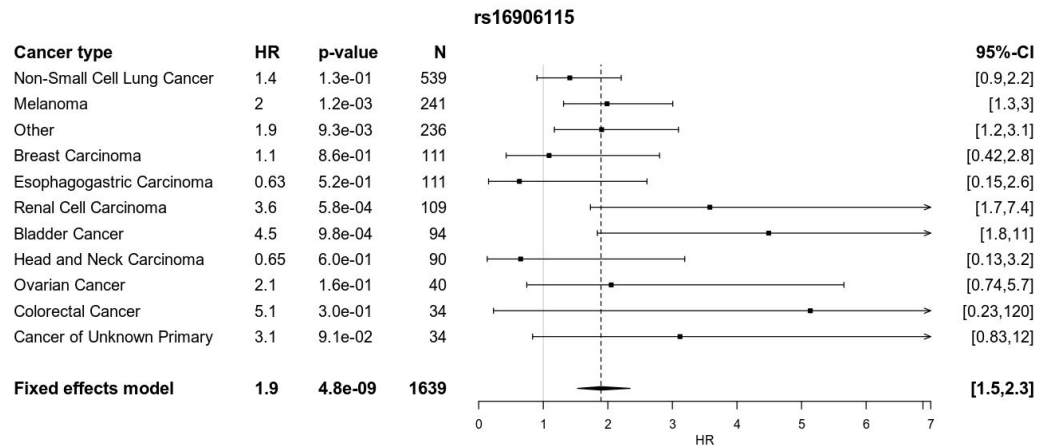

b.

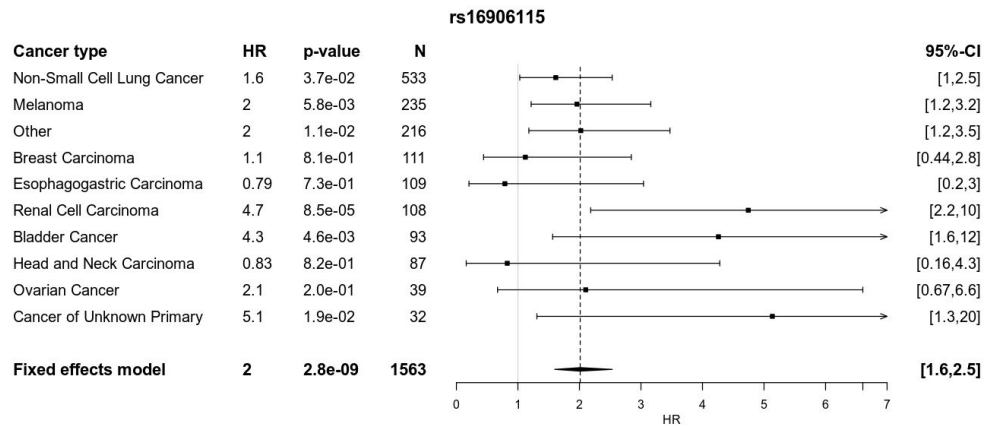

# Figure S7

**a.**

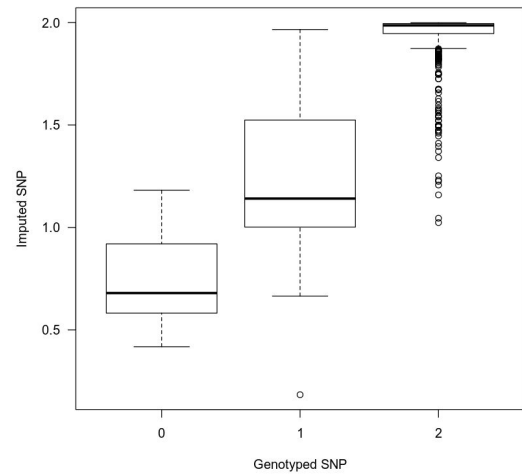

**b.**

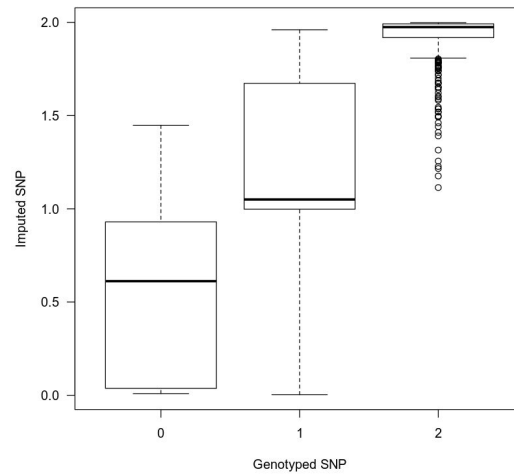

**c.**

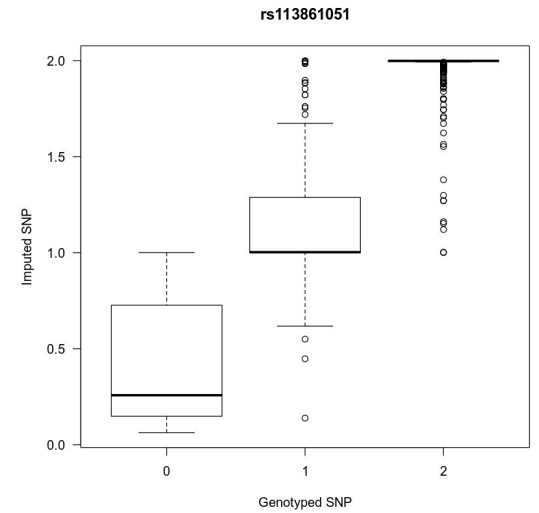



Figure S8

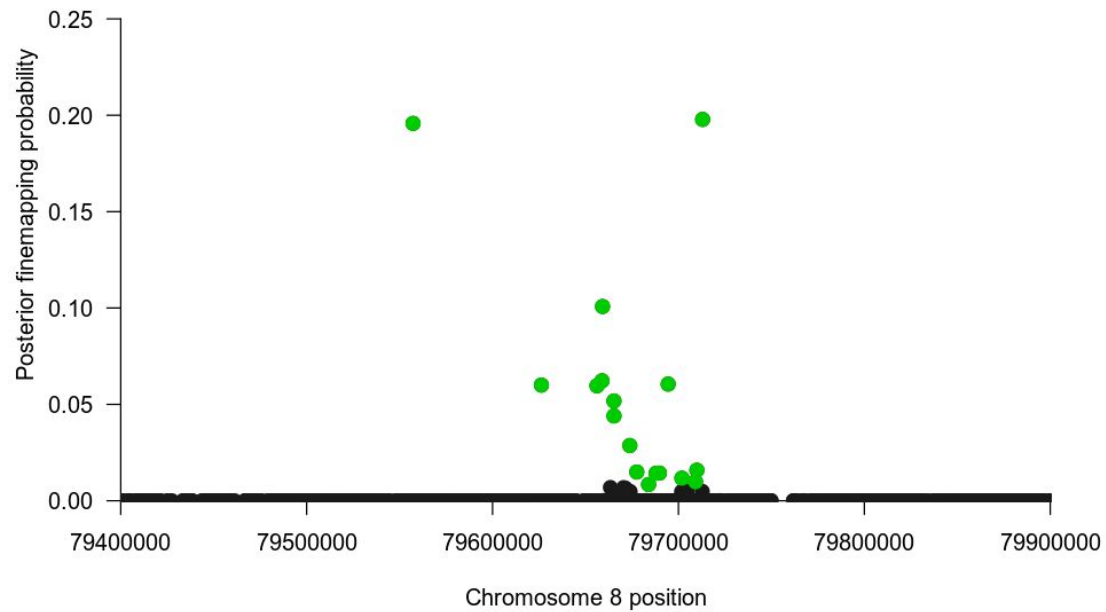

# Figure S9

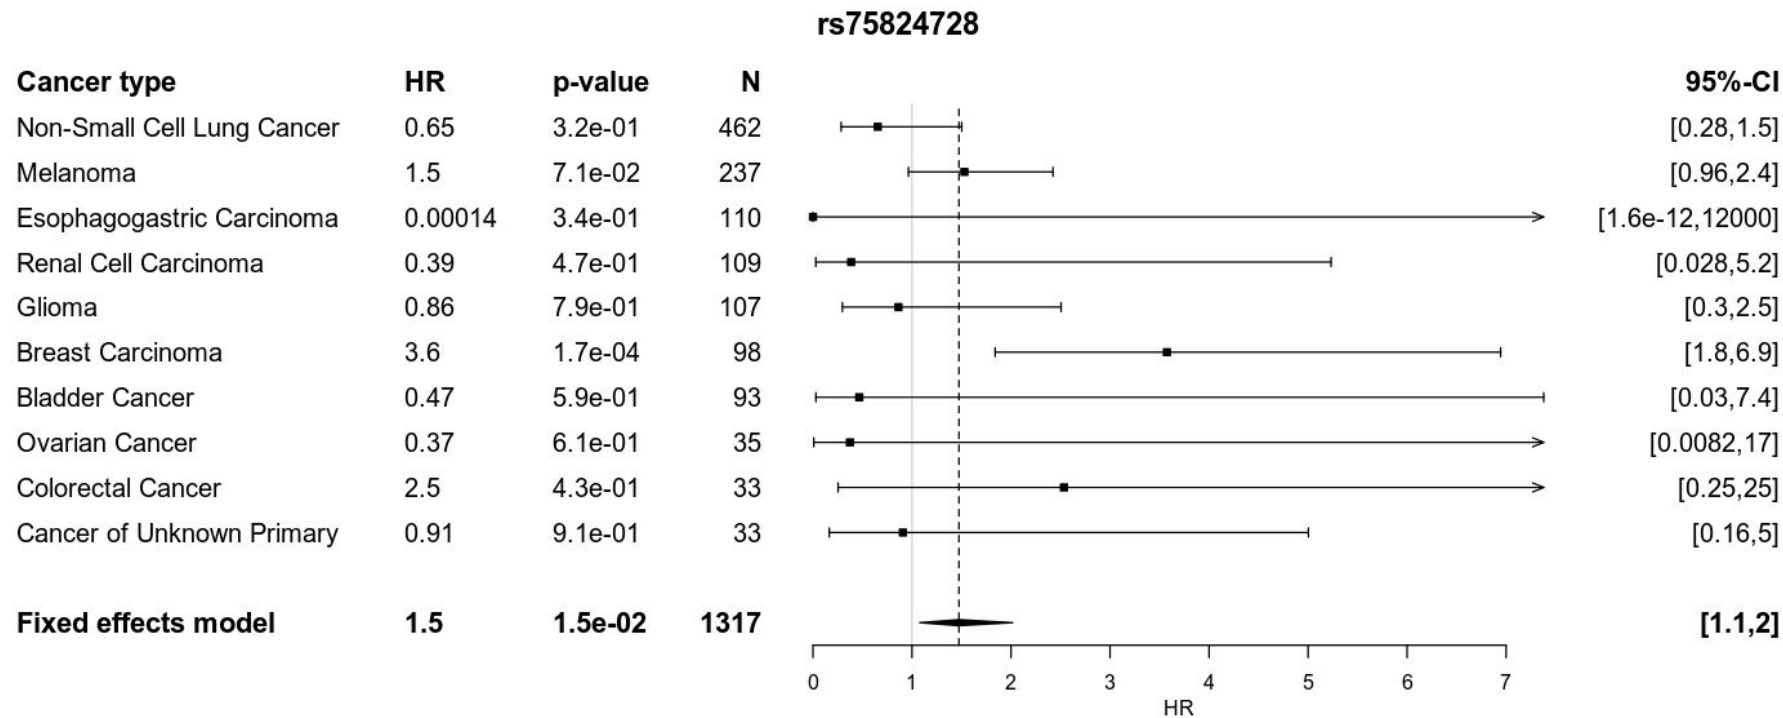

Figure S10

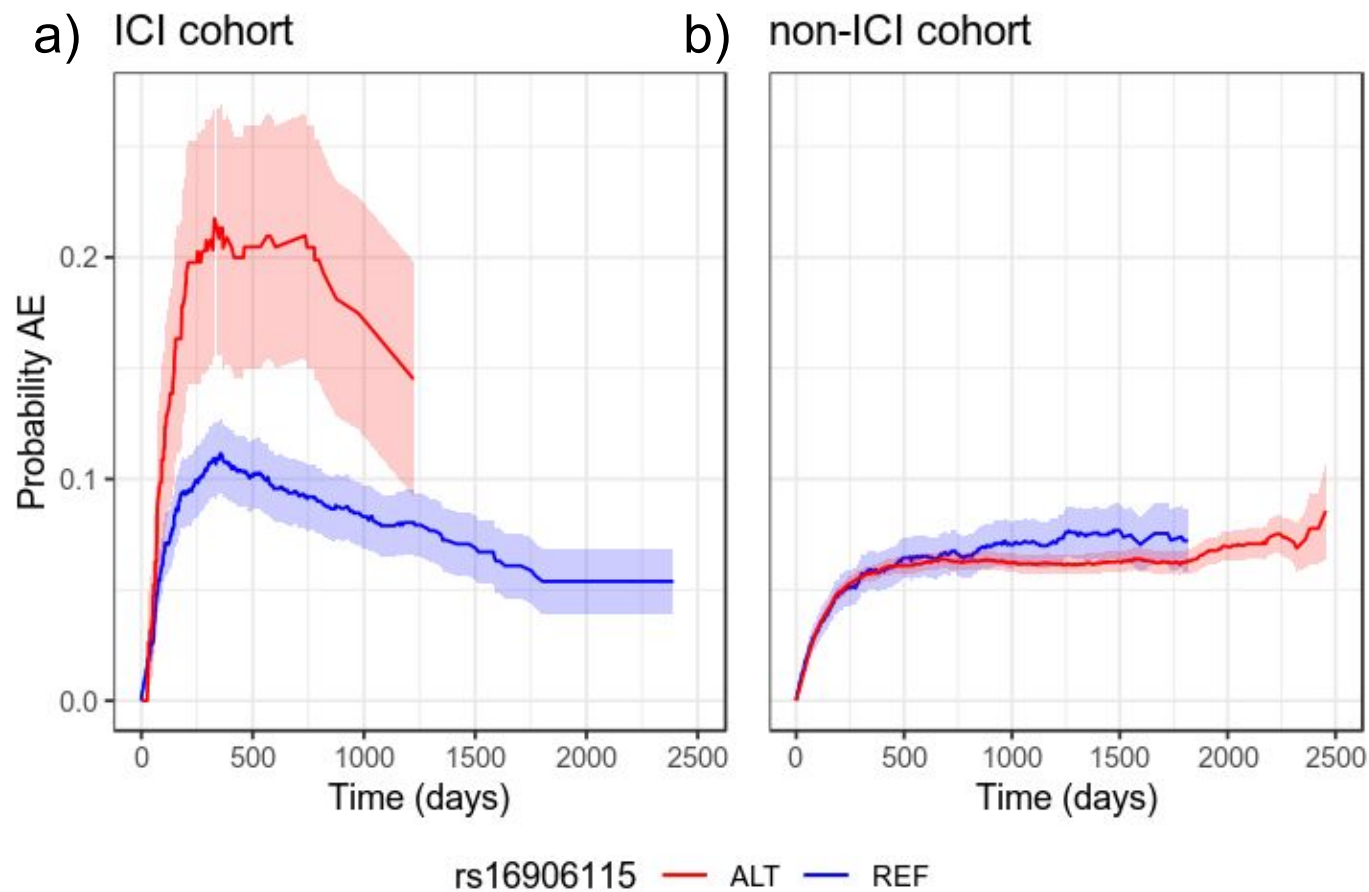

# Figure S11

**a.**

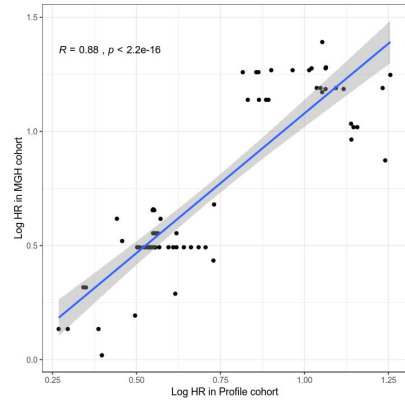

**b.**

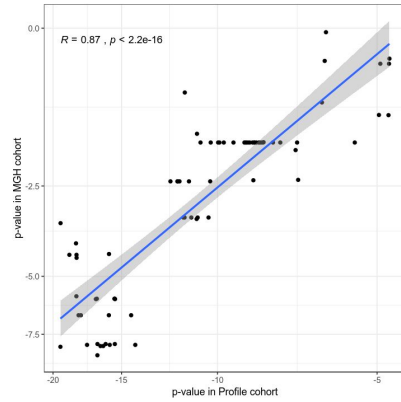

**c.**

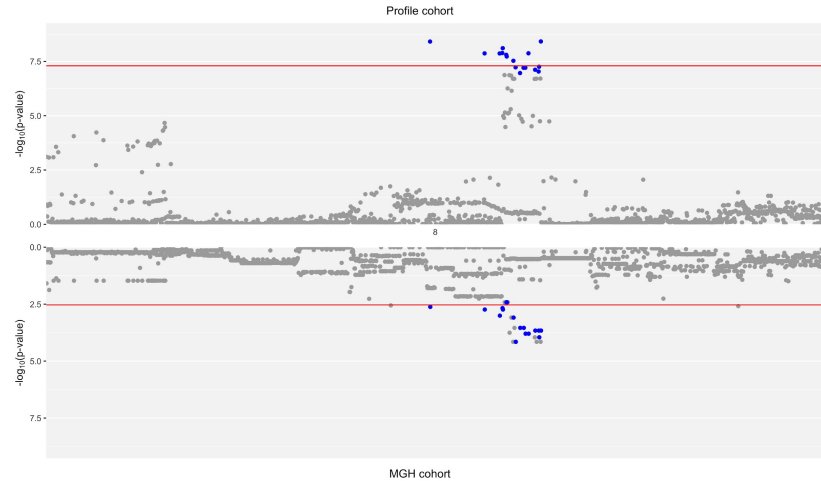

# Figure S12

**a.**

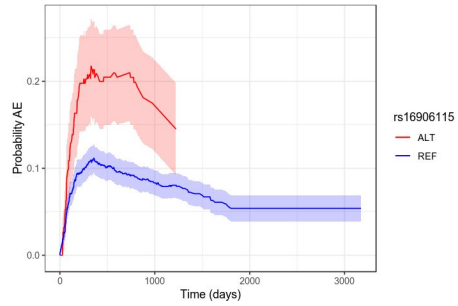

**b.**

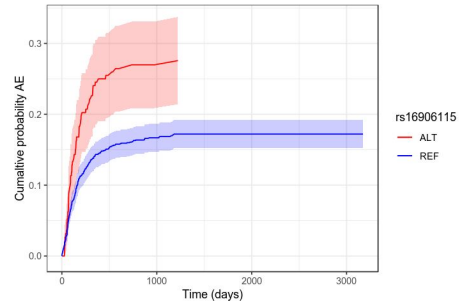

**c.**

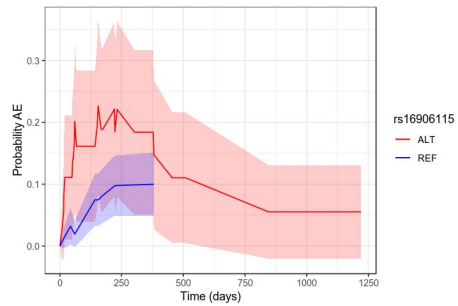

**d.**

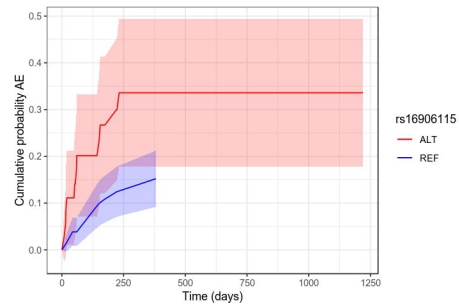

# Figure S13

(a)

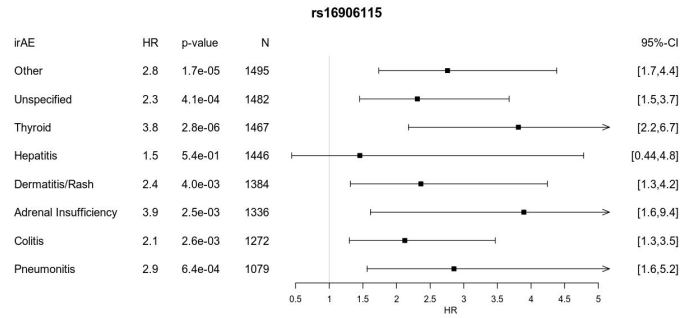

(b)

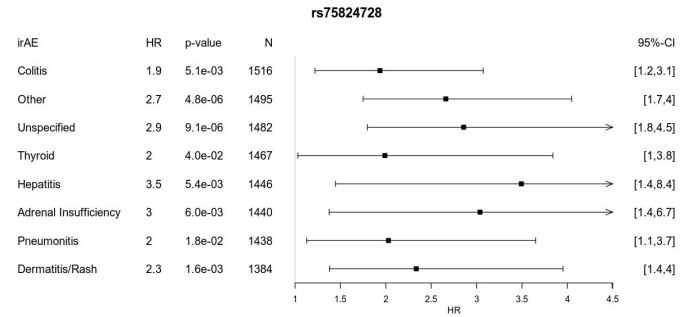

(c)

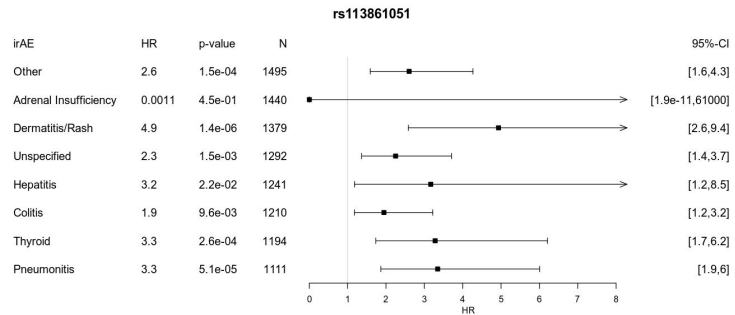

# Figure S14

(a)

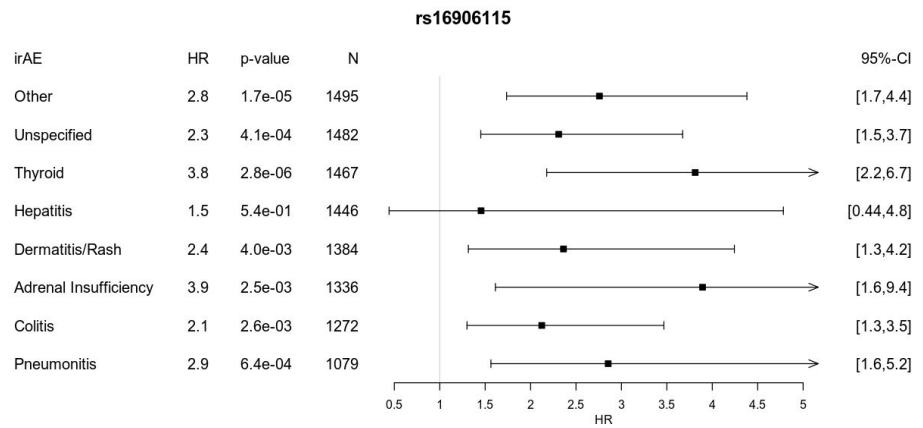

(b)

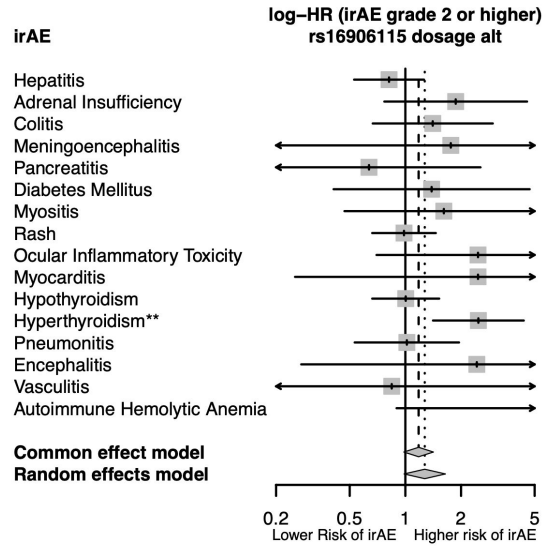

# Figure S15

(a)

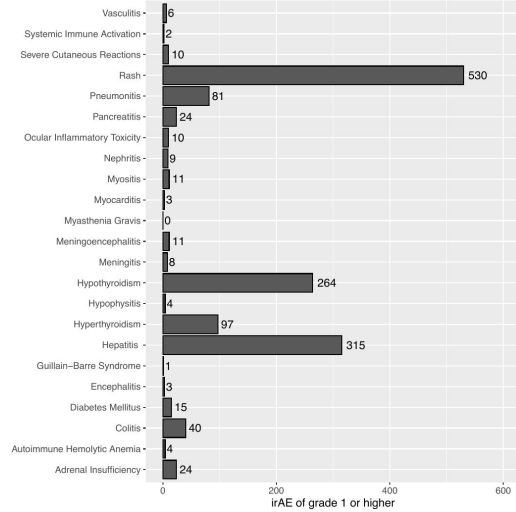

(b)

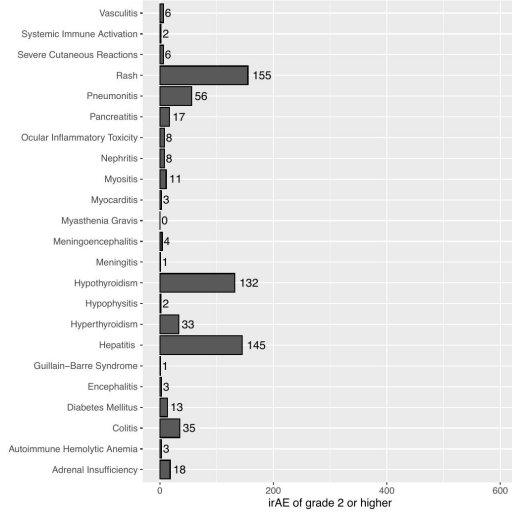

(c)

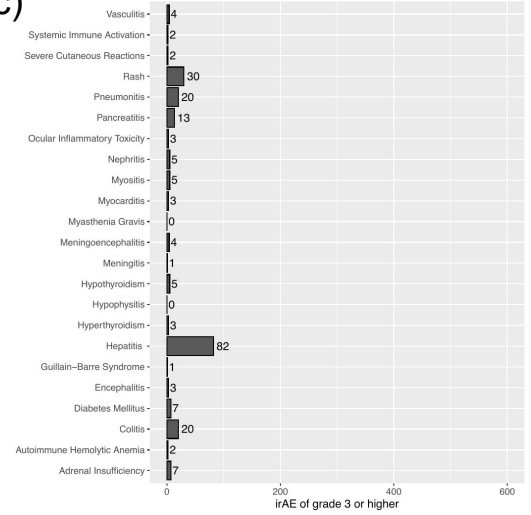



# Figure S16

(a)

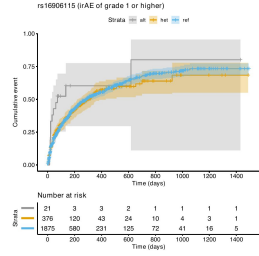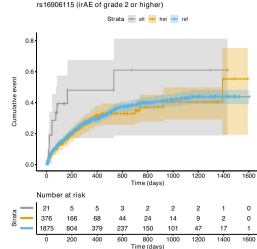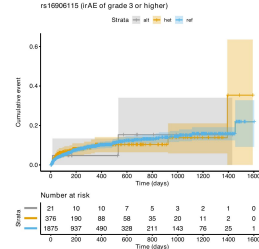

(b)

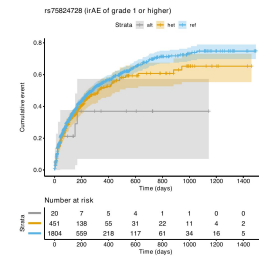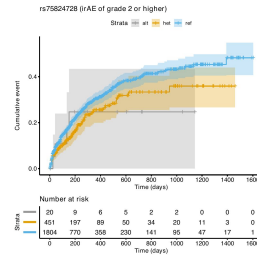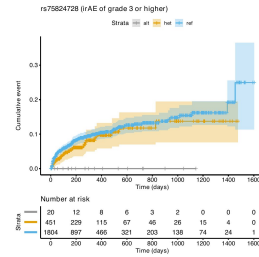

(c)

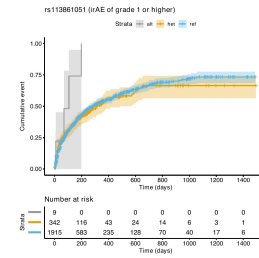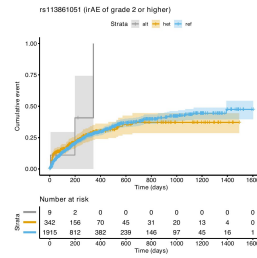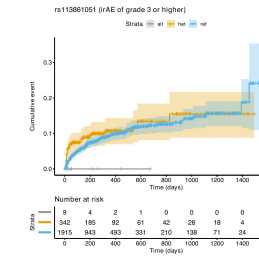

# Figure S17

(a)

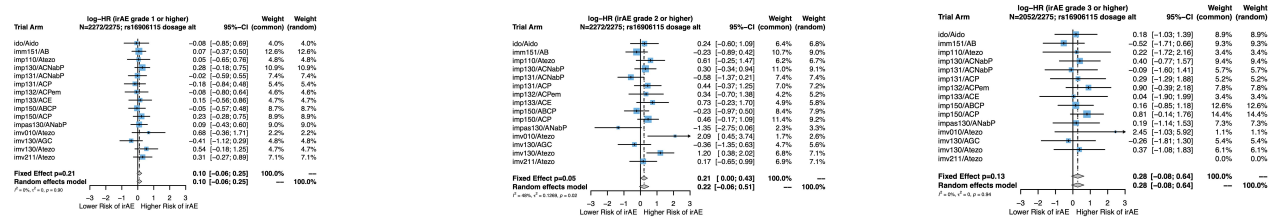

(b)

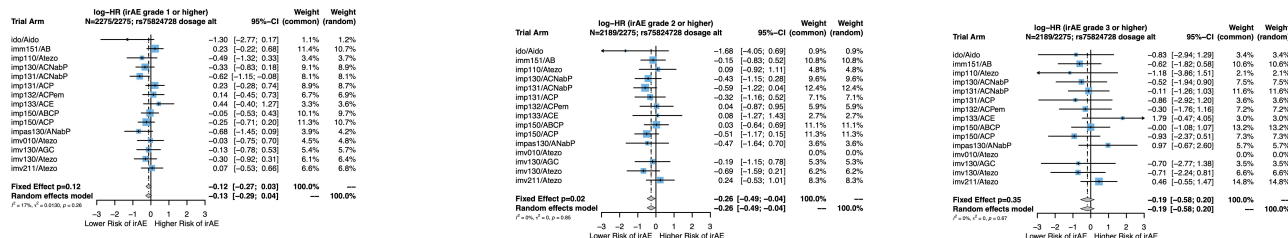

(c)

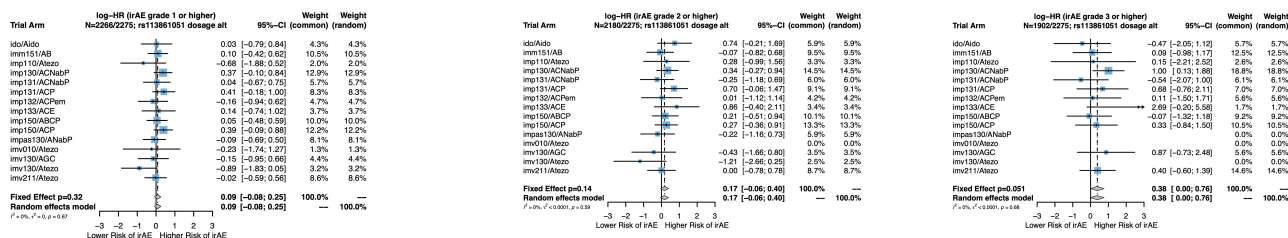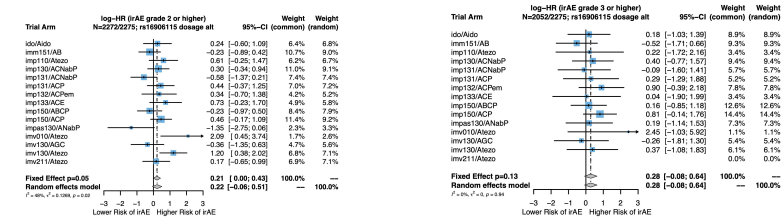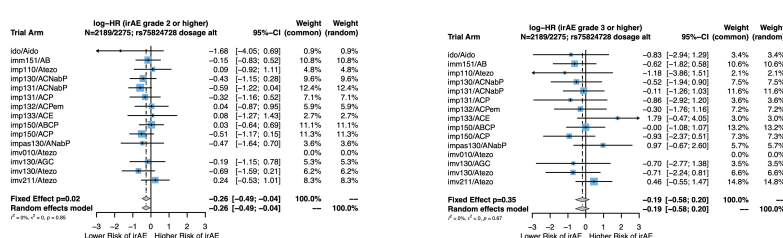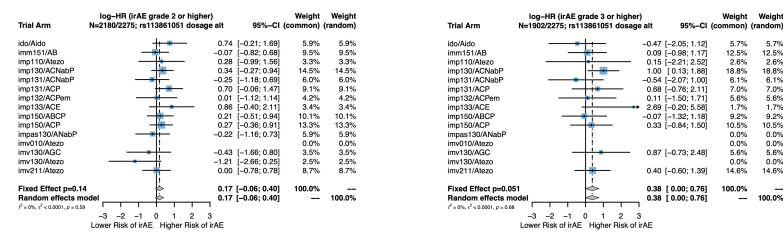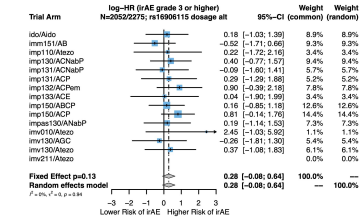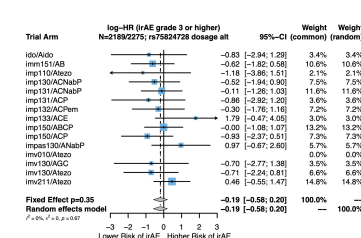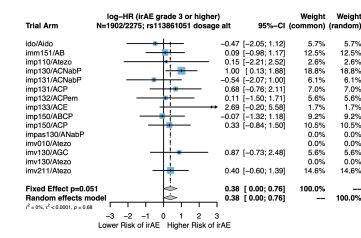

# Figure S18

(a)

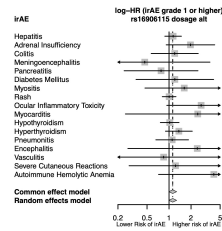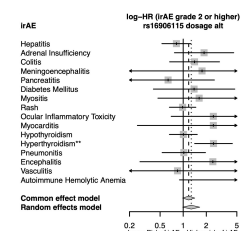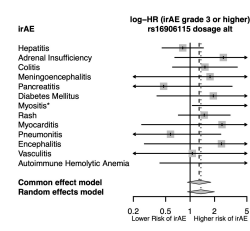

(b)

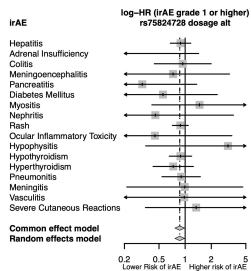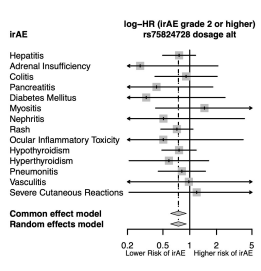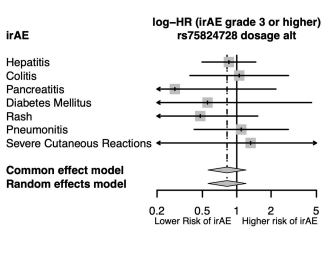

(c)

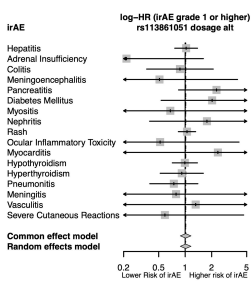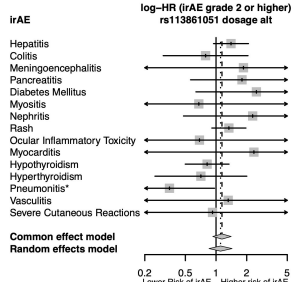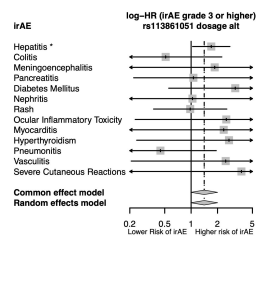

# Figure S19

a.

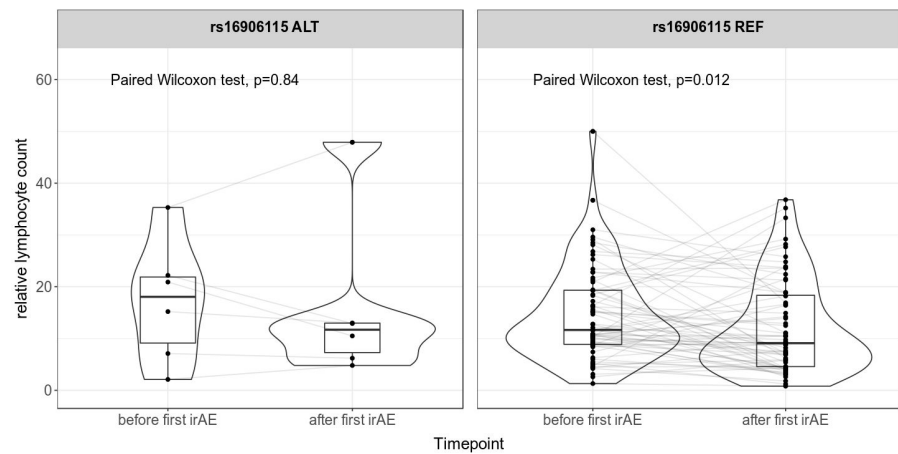

b.

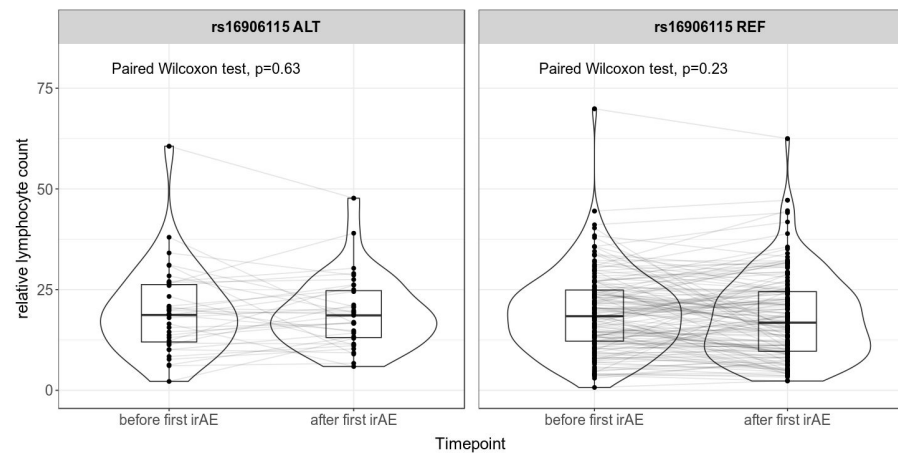

Figure S20

78740082:78749524 junction (Testis)

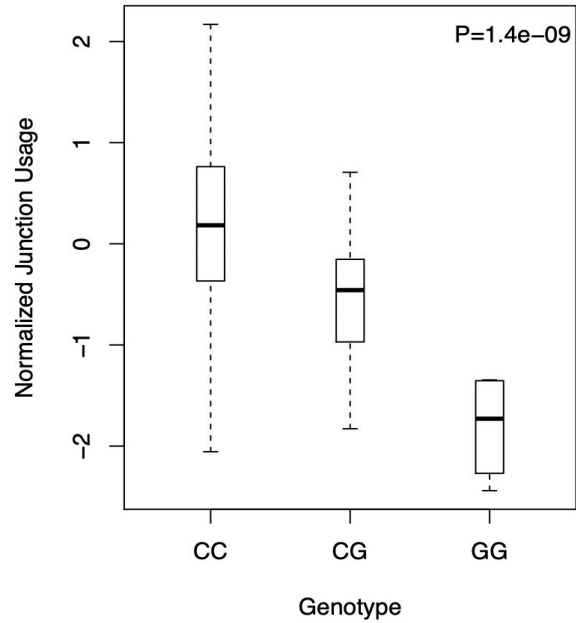

IL7 cryptic exon (Testis)

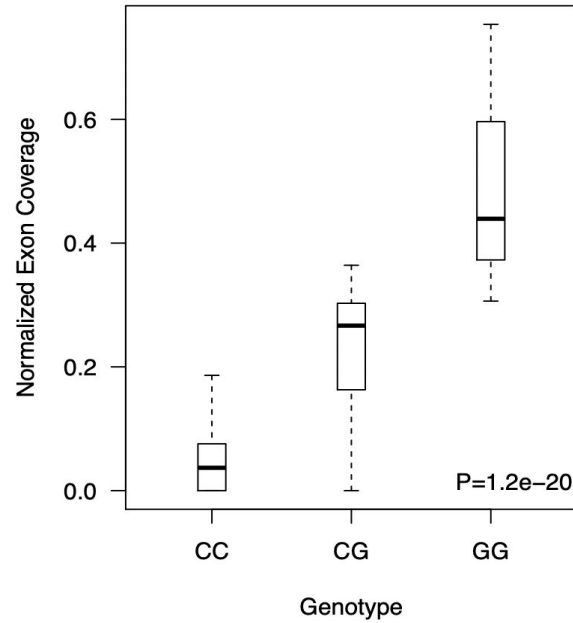

# Figure S21

a.

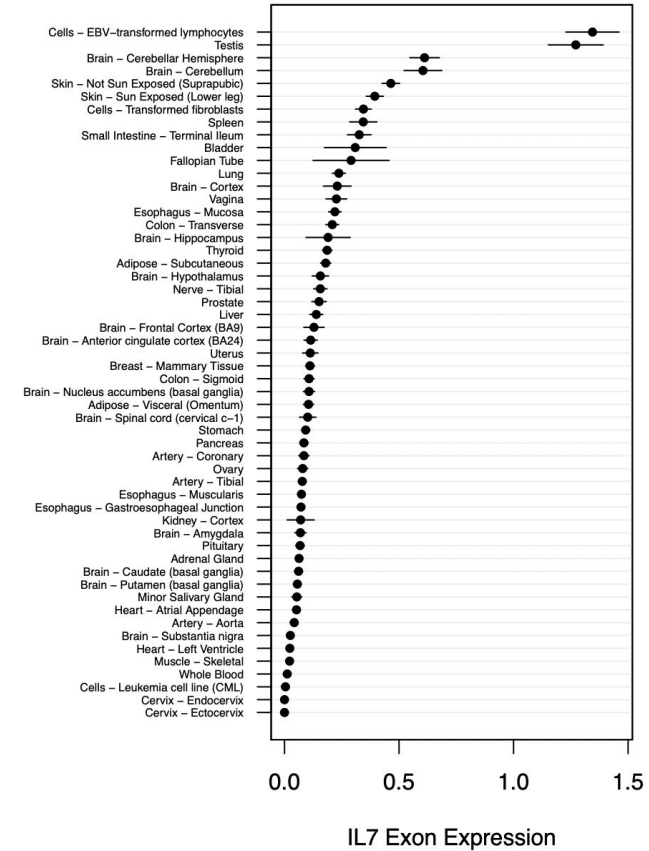

b.

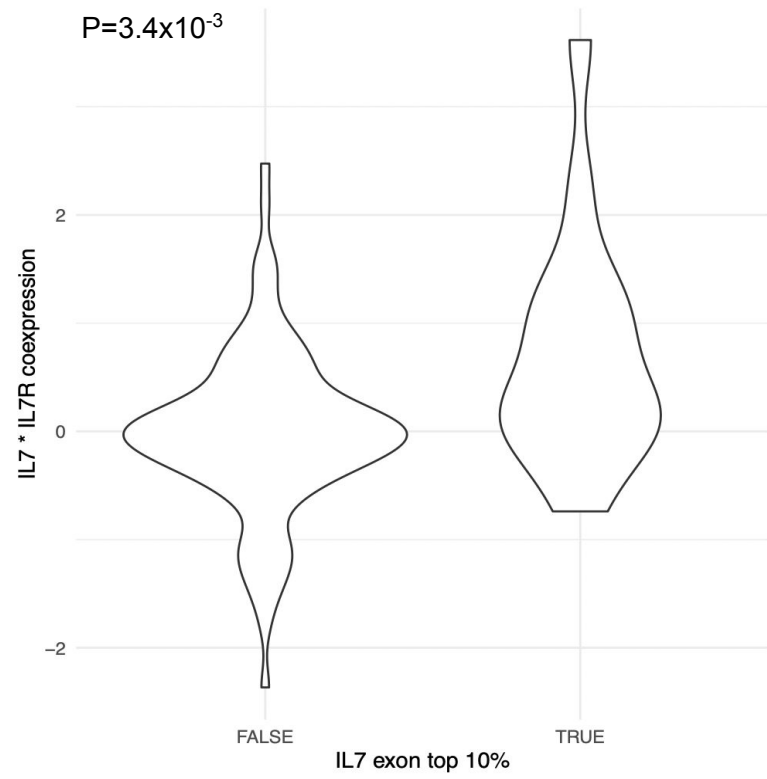

# Figure S22

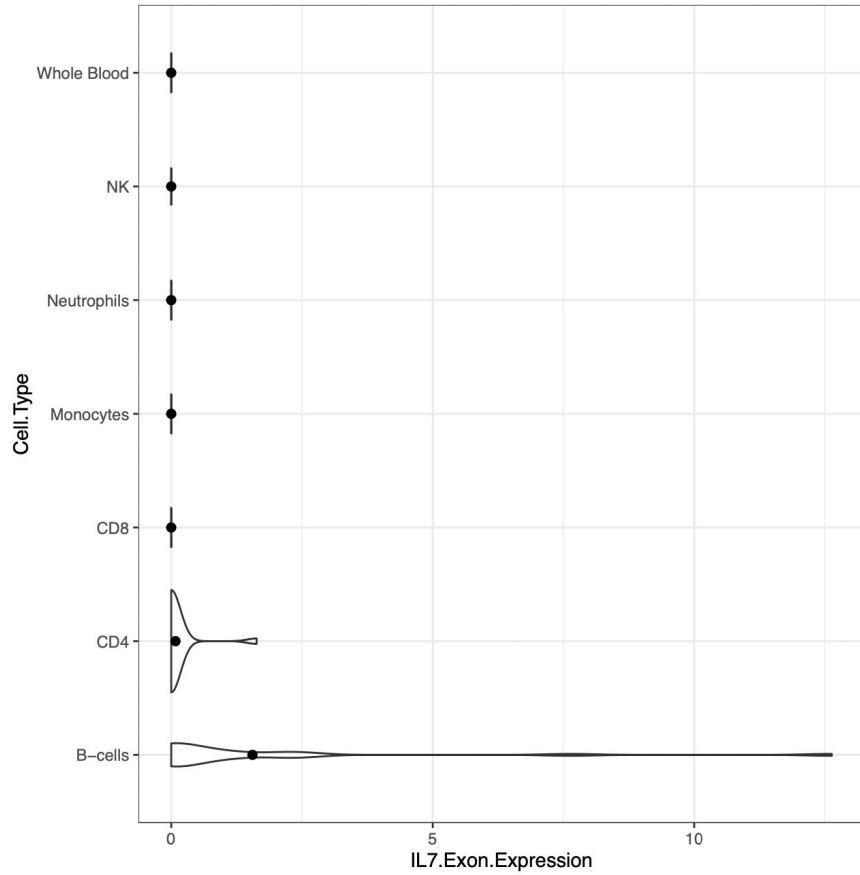

# Figure S23

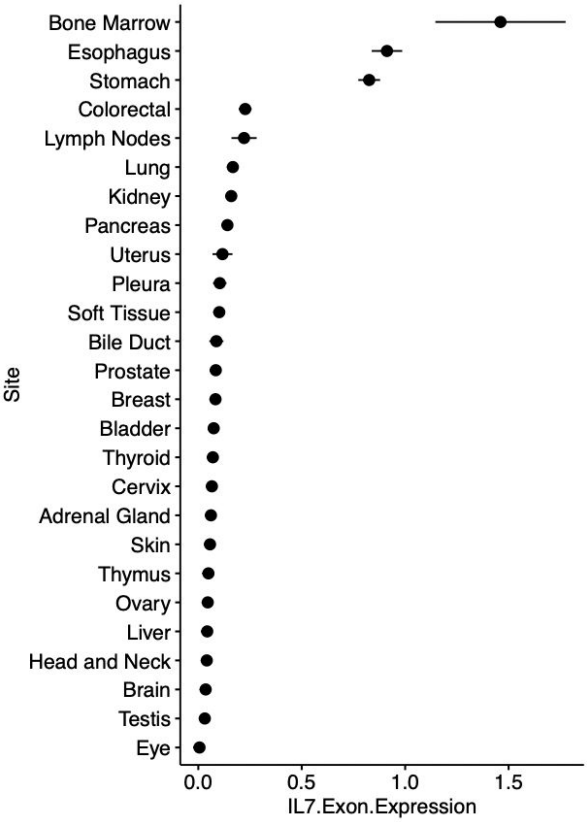



### Previous autoimmune disease

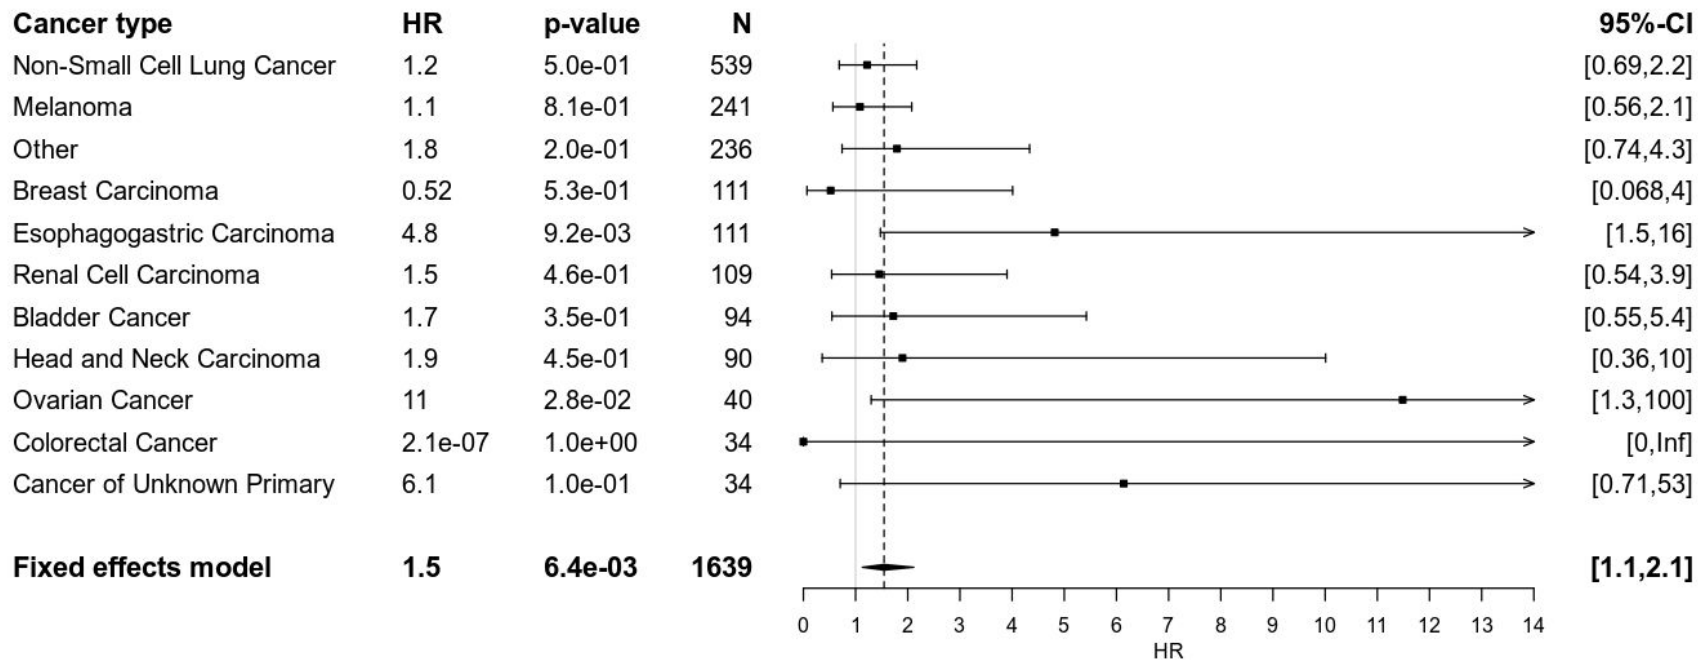

Figure S24: Previous autoimmune disease

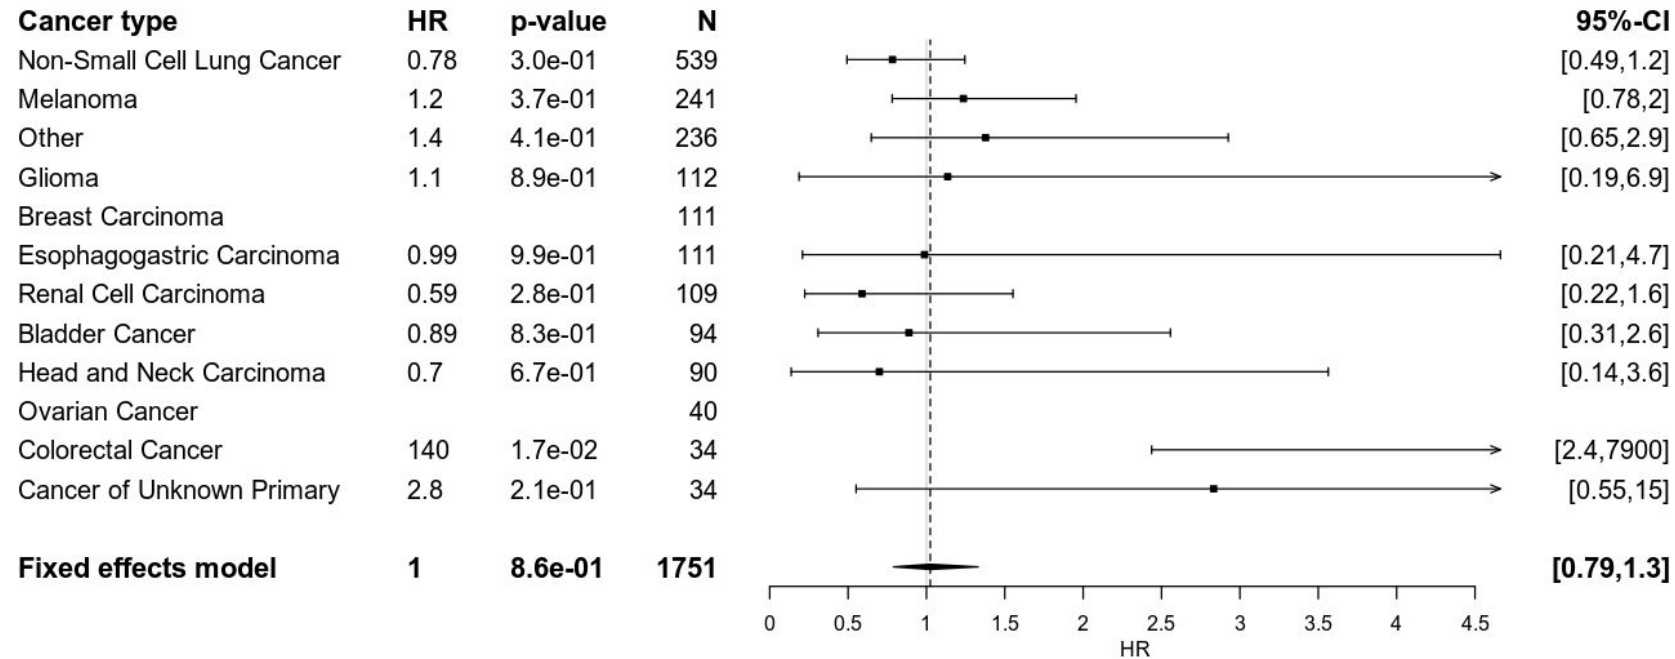

Figure S25: Sex difference

# Table S1

| Immune Feature                          | IL7 Exon Usage |         | IL7 Expression |         | IL7 Exon   IL7 expression |         |
|-----------------------------------------|----------------|---------|----------------|---------|---------------------------|---------|
|                                         | Z-Score        | P-value | Z-Score        | P-value | Z-Score                   | P-value |
| Leukocyte.Fraction                      | 9.2            | 7E-20   | 8.2            | 3E-16   | 7.7                       | 2E-14   |
| Stromal.Fraction                        | 8.1            | 6E-16   | 3.4            | 7E-04   | 7.6                       | 4E-14   |
| Proliferation                           | 7.2            | 5E-13   | -1.4           | 2E-01   | 7.7                       | 2E-14   |
| Wound.Healing                           | 7.1            | 1E-12   | 16.4           | 2E-59   | 4.0                       | 6E-05   |
| Macrophage.Regulation                   | 7.1            | 1E-12   | -5.2           | 2E-07   | 8.3                       | 9E-17   |
| Lymphocyte.Infiltration.Signature.Score | 6.6            | 4E-11   | 4.1            | 4E-05   | 5.9                       | 4E-09   |
| IFN.gamma.Response                      | 5.6            | 3E-08   | 7.2            | 9E-13   | 4.2                       | 2E-05   |
| TGF.beta.Response                       | 5.5            | 4E-08   | 1.5            | 1E-01   | 5.3                       | 1E-07   |
| BCR.Shannon                             | 5.3            | 1E-07   | 2.0            | 5E-02   | 5.0                       | 8E-07   |
| TCR.Shannon                             | 4.0            | 7E-05   | 1.5            | 1E-01   | 3.8                       | 2E-04   |
| TCR.Richness                            | 3.9            | 1E-04   | 7.7            | 2E-14   | 2.4                       | 2E-02   |
| CTA.Score                               | 3.5            | 4E-04   | 1.8            | 8E-02   | 3.2                       | 1E-03   |
| Th1.Cells                               | 3.3            | 1E-03   | 12.8           | 4E-37   | 0.8                       | 4E-01   |
| Th2.Cells                               | 3.3            | 1E-03   | 21.8           | 5E-103  | -1.0                      | 3E-01   |
| Th17.Cells                              | 2.8            | 6E-03   | -5.3           | 2E-07   | 3.9                       | 8E-05   |
| B.Cells.Naive                           | 2.3            | 2E-02   | 4.0            | 6E-05   | 1.5                       | 1E-01   |
| Dendritic.Cells.Resting                 | 1.0            | 3E-01   | -3.9           | 1E-04   | 1.8                       | 7E-02   |
| Macrophages.M0                          | 0.5            | 6E-01   | -9.9           | 4E-23   | 2.6                       | 9E-03   |
| Macrophages.M1                          | 0.4            | 7E-01   | 3.8            | 2E-04   | -0.4                      | 7E-01   |
| Macrophages.M2                          | 0.2            | 8E-01   | -4.8           | 2E-06   | 1.2                       | 2E-01   |
| Mast.Cells.Activated                    | -0.1           | 1E+00   | 6.6            | 4E-11   | -1.4                      | 2E-01   |
| NK.Cells.Activated                      | -0.6           | 5E-01   | -4.2           | 3E-05   | 0.2                       | 8E-01   |
| Plasma.Cells                            | -0.7           | 5E-01   | -11.5          | 3E-30   | 1.7                       | 9E-02   |
| T.Cells.CD4.Memory.Resting              | -1.1           | 3E-01   | -3.7           | 2E-04   | -0.3                      | 7E-01   |
| T.Cells.CD8                             | -1.3           | 2E-01   | -6.7           | 2E-11   | 0.1                       | 1E+00   |
| T.Cells.Follicular.Helper               | -2.6           | 9E-03   | -4.7           | 3E-06   | -1.7                      | 9E-02   |
| T.Cells.Regulatory.Tregs                | -3.6           | 3E-04   | -1.2           | 2E-01   | -3.4                      | 7E-04   |
| Lymphocytes                             | -3.6           | 3E-04   | -6.6           | 4E-11   | -2.3                      | 2E-02   |
| Macrophages                             | -4.2           | 2E-05   | -2.8           | 5E-03   | -3.8                      | 2E-04   |

 Positive association  
 Negative association

Table S2: Interaction Analysis

| SNP         | Chromosome | Position | Posterior probability | P-value in Profile cohort |
|-------------|------------|----------|-----------------------|---------------------------|
| rs16906115  | 8          | 79712998 | 0.1978415408          | 3.79E-09                  |
| rs7011565   | 8          | 79557237 | 0.1957790135          | 3.83E-09                  |
| rs16906062  | 8          | 79659182 | 0.1007706209          | 7.75E-09                  |
| rs7816685   | 8          | 79658906 | 0.06223026669         | 1.29E-08                  |
| rs73251644  | 8          | 79694464 | 0.06051930009         | 1.33E-08                  |
| rs73249933  | 8          | 79626275 | 0.05998693589         | 1.34E-08                  |
| rs74197776  | 8          | 79656182 | 0.05961872189         | 1.35E-08                  |
| rs117355070 | 8          | 79665307 | 0.05176578818         | 1.57E-08                  |
| rs116228140 | 8          | 79665329 | 0.04399633208         | 1.87E-08                  |
| rs141792902 | 8          | 79673847 | 0.02865189034         | 2.95E-08                  |
| rs4739139   | 8          | 79709926 | 0.01583309901         | 5.54E-08                  |
| rs59286098  | 8          | 79677592 | 0.01490514512         | 5.91E-08                  |
| rs16906090  | 8          | 79689755 | 0.01434440485         | 6.16E-08                  |
| rs10110519  | 8          | 79688026 | 0.01428458798         | 6.18E-08                  |
| rs2717536   | 8          | 79701876 | 0.01170948825         | 7.64E-08                  |
| rs9942766   | 8          | 79709182 | 0.009834019143        | 9.20E-08                  |
| rs2919935   | 8          | 79683948 | 0.008440074784        | 1.08E-07                  |

Table S3: 95% credible set.

| Study name                | Reference                                                                                                              |
|---------------------------|------------------------------------------------------------------------------------------------------------------------|
| IDO inhibitor trial (ido) | Jung KH, LoRusso P, Burris H, et al., Clin Cancer Res, 2019                                                            |
| imm151 /<br>IMmotion151   | Rini BI, Powles T, Atkins MB, et al, Lancet, 2019                                                                      |
| imp110 / IMpower110       | Herbst RS, Giaccone G, de Marinis F, et al., N Engl J Med, 2020                                                        |
| imp130 / IMpower130       | West H, McCleod M, Hussein M, et al., Lancet Oncol., 2019                                                              |
| imp131 / IMpower131       | Jotte R, Cappuzzo F, Vynnychenko I, et al., J Thorac Oncol., 2020                                                      |
| imp132 / IMpower132       | Nishio M, Barlesi F, West H, et al., J Thorac Oncol., 2021                                                             |
| imp133 / IMpower133       | Horn L, Mansfield AS, Szczęśna A, et al., N Engl J Med., 2018                                                          |
| imp150 / IMpower150       | Socinski MA, Jotte RM, Cappuzzo F, et al., N Engl J Med., 2018                                                         |
| impas130<br>/IMpassion130 | Schmid P, Adams S, Rugo HS, et al., N Engl J Med., 2018<br><br>Schmid P, Rugo HS, Adams S, et al., Lancet Oncol., 2020 |
| imv010 / IMvigora010      | Bellmunt J, Hussain M, Gschwend JE, et al., Lancet Oncol., 2021                                                        |
| imv130 / IMvigora130      | Galsky MD, Ariba J, Bamias A, et al., Lancet, 2020                                                                     |
| imv211 / IMvigora211      | Powles T, Durán I, van der Heijden MS, et al., Lancet, 2018                                                            |

Table S4: Clinical trial replication cohorts

| SNP         | Ref>Alt | Profile cohort    |                      |           | MGH cohort        |         |           | Clinical trial cohort |         |
|-------------|---------|-------------------|----------------------|-----------|-------------------|---------|-----------|-----------------------|---------|
|             |         | HR [95% conf int] | p-value              | Frequency | HR [95% conf int] | p-value | Frequency | HR [95% conf int]     | p-value |
| rs16906115  | G>A     | 2.0 [1.6-2.5]     | 3.8x10 <sup>-9</sup> | 0.08      | 3.6 [1.8-7.1]     | 0.00028 | 0.10      | 1.2 [1.0-1.5]         | 0.05    |
| rs75824728  | G>A     | 1.9 [1.5-2.4]     | 8.4x10 <sup>-9</sup> | 0.10      | 1.49 [0.67-3.2]   | 0.4     | 0.08      | 0.77 [0.61-0.96]      | 0.02    |
| rs113861051 | A>(G/T) | 2.0 [1.6-2.6]     | 1.1x10 <sup>-8</sup> | 0.07      | 1.4 [0.50-3.7]    | 0.55    | 0.08      | 1.18 [0.94-1.5]       | 0.14    |

Table S5: Genome wide significant loci

| Cohort | Hazard ratio [95% conf int] | p-value |
|--------|-----------------------------|---------|
| DFCI   | 1.2 [0.98,1.5]              | 0.083   |
| MGH    | 1.3 [1.1-1.5]               | 0.007   |

Table S6: Overall survival association



Table S7: Search terms

| irAE type             | rs16906115 |       | rs75824728 |       | rs113861051 |       |
|-----------------------|------------|-------|------------|-------|-------------|-------|
|                       | ALT        | REF   | ALT        | REF   | ALT         | REF   |
| Colitis               | 0.075      | 0.057 | 0.07       | 0.058 | 0.095       | 0.056 |
| Other                 | 0.086      | 0.042 | 0.11       | 0.039 | 0.11        | 0.04  |
| Thyroid               | 0.08       | 0.025 | 0.042      | 0.03  | 0.061       | 0.029 |
| Hepatitis             | 0.024      | 0.014 | 0.036      | 0.013 | 0.024       | 0.015 |
| Adrenal insufficiency | 0.024      | 0.016 | 0.036      | 0.015 | 0.008       | 0.018 |
| Pneumonitis           | 0.042      | 0.031 | 0.048      | 0.03  | 0.11        | 0.024 |
| Dermatitis/Rash       | 0.07       | 0.04  | 0.075      | 0.039 | 0.081       | 0.04  |

Table S8: irAE frequency in carriers and non-carriers by irAE type

|                    |     | relative occurrence |               | absolute occurrence |               |
|--------------------|-----|---------------------|---------------|---------------------|---------------|
|                    |     | Stopped therapy     | Steroid given | Stopped therapy     | Steroid given |
| <b>rs16906115</b>  | ALT | 0.45                | 0.48          | 20                  | 21            |
|                    | REF | 0.5                 | 0.5           | 1                   | 1             |
| <b>rs75824728</b>  | ALT | 0.36                | 0.36          | 4                   | 4             |
|                    | REF | 0.49                | 0.51          | 17                  | 18            |
| <b>rs113861051</b> | ALT | 0                   | 0             | 0                   | 0             |
|                    | REF | 0.54                | 0.56          | 21                  | 22            |

Table S9: Occurrence of terminated therapy or steroid administration after irAE

| <b>grade of irAE</b> | <b>Number of events</b> | <b>Frequency</b> |
|----------------------|-------------------------|------------------|
| 1                    | 8                       | 0.18             |
| 2                    | 19                      | 0.42             |
| 3                    | 15                      | 0.33             |
| 4                    | 2                       | 0.044            |
| 5                    | 1                       | 0.022            |

Table S10

| test_name            | HR           | pval           |
|----------------------|--------------|----------------|
| ETV4 deletion        | 5.731719668  | 0.003699400454 |
| PRS: PRSWEB_PHE      | 0.7550949468 | 0.01001543655  |
| PRS: BRCA.ERPOS      | 0.7198298798 | 0.01044343632  |
| SNV in PBRM1         | 3.785056795  | 0.01161673183  |
| PRS: UKB_460K.bp     | 1.341783947  | 0.01183205383  |
| FKBP9 deletion       | 23.06985775  | 0.01268981956  |
| PRS: PRSWEB_PHE      | 0.7614820971 | 0.01491898934  |
| RAD21 amplification  | 0.5100807525 | 0.01581436951  |
| MYC amplification    | 0.5282454208 | 0.01641313591  |
| EXT1 amplification   | 0.5224209595 | 0.01805440023  |
| HLA_B_3502           | 0.1824060558 | 0.01885730417  |
| TSC1 deletion        | 2.267507641  | 0.01910335487  |
| RIT1 amplification   | 0.3546174109 | 0.02092329033  |
| SNV in KEAP1         | 18.62636694  | 0.02224104713  |
| PRS: UKB_460K.bp     | 1.297755261  | 0.02338238714  |
| MYBL1 amplification  | 0.5130646042 | 0.02466486936  |
| PRS: MEDS_PMI3       | 1.271415031  | 0.02550118264  |
| SNV in BAP1          | 5.212250631  | 0.02665151397  |
| SNV in KDM5C         | 8.984942194  | 0.02892369297  |
| NBN amplification    | 0.5245835871 | 0.0290023963   |
| MCL1 amplification   | 0.5476359034 | 0.02942844719  |
| EED deletion         | 0.2025410208 | 0.02984498504  |
| GLI3 deletion        | 20.15783465  | 0.03060921184  |
| PRS: PRSWEB_PHE      | 0.8122150141 | 0.03282254513  |
| JAK1 deletion        | 2.763798906  | 0.03376495058  |
| PRS: UKB_460K.dis    | 1.301543093  | 0.03412615435  |
| GBA amplification    | 0.3876058761 | 0.03639044686  |
| PTCH1 deletion       | 2.058935475  | 0.03642655925  |
| RSPO2 amplification  | 0.4444248628 | 0.03847852215  |
| PRKDC amplification  | 0.5333109362 | 0.04039814261  |
| Lab value: MPV       | 1.304653328  | 0.04075217595  |
| SNV in DNMT3A        | 264.1946866  | 0.04083390644  |
| PRDM1 deletion       | 0.4961774501 | 0.04085103024  |
| FANCC deletion       | 1.998357002  | 0.04190215746  |
| HLA_A_0101           | 0.6695153848 | 0.04210819356  |
| NPRL2 amplification  | 8.530256906  | 0.04329046232  |
| CDC73 deletion       | 11.65016524  | 0.04347320142  |
| BCL2 amplification   | 0.2117517967 | 0.04408131728  |
| FANCG amplification  | 0.1693113757 | 0.04820008356  |
| BRCC3 amplification  | 7.221922411  | 0.04832622552  |
| HLA_B_4403           | 1.801459696  | 0.04855363658  |
| PRS: Stratified_rect | 0.7949677598 | 0.04992908715  |

|                     |              |               |
|---------------------|--------------|---------------|
| HLA_B_3503          | 2.854659263  | 0.05046039981 |
| Lab value: GLOB     | 0.6540182794 | 0.05388394331 |
| NTRK2 deletion      | 1.939829268  | 0.05388878251 |
| NOTCH1 deletion     | 1.922227665  | 0.05456673281 |
| PRS: MEDS_P MID3    | 1.226524685  | 0.05507243575 |
| PRS: UKB_460K.blo   | 1.253378239  | 0.05557997345 |
| RECQL4 amplificati  | 0.5551500377 | 0.05757071479 |
| PRKDC deletion      | 2.82974404   | 0.05790906468 |
| PRS: PMID27863252   | 0.8226974173 | 0.06043442068 |
| KRAS deletion       | 2.959313964  | 0.06174435205 |
| POLE amplification  | 3.146149137  | 0.06404531867 |
| XPA deletion        | 1.895261676  | 0.0643297655  |
| MPL amplification   | 0.2806639645 | 0.06455896714 |
| FLT4 amplification  | 2.165435643  | 0.06551916053 |
| PRS: PMID27863252   | 0.8276926911 | 0.06593843775 |
| PRS: PMID27863252   | 1.203457168  | 0.06594616918 |
| SNV in RBM10        | 3.912205743  | 0.06603365102 |
| Lab value: CA       | 1.784857218  | 0.0660394233  |
| RHOA deletion       | 2.631459671  | 0.0666891275  |
| Lab value: MG       | 0.1760334704 | 0.06669127974 |
| COL7A1 deletion     | 2.644680642  | 0.06756404418 |
| KCNQ1 deletion      | 3.100325708  | 0.06863997054 |
| RBBP8 deletion      | 2.949557127  | 0.06866020384 |
| PRKCZ deletion      | 0.3210232092 | 0.06878303899 |
| AURKA deletion      | 7.291338306  | 0.06880891996 |
| BRAF amplification  | 0.5271258845 | 0.06907776553 |
| GNAS deletion       | 5.565842771  | 0.06995396938 |
| Lab value: LDH      | 1.001399607  | 0.07021888922 |
| ZNF217 deletion     | 7.174919959  | 0.07176635775 |
| PRS: GLIOMA         | 1.19285215   | 0.07249755917 |
| PRKCI deletion      | 0.1842391603 | 0.07411007153 |
| PRS: TRICL.sma_ns   | 1.269822053  | 0.07416063287 |
| Lab value: PT       | 1.178014941  | 0.07510240999 |
| PRS: PMID27863252   | 0.8339632996 | 0.07599485474 |
| PRS: PRSWEB_PHE     | 0.8052972789 | 0.07704299224 |
| CDKN2C amplificati  | 0.19279148   | 0.07822485453 |
| PRS: PMID27863252   | 0.8344714008 | 0.07826029488 |
| FANCG deletion      | 1.599678077  | 0.07850422435 |
| GATA3 deletion      | 0.4902290496 | 0.07905322108 |
| PRSS1 amplification | 0.347412307  | 0.08135115968 |
| LMO3 deletion       | 2.568873752  | 0.08185959706 |
| PRKAR1A amplifica   | 0.5315628231 | 0.08349579877 |
| PRS: UKB_460K.pig   | 1.243722681  | 0.08383145173 |

|                      |                |               |
|----------------------|----------------|---------------|
| HLA_B_4901           | 2.308193489    | 0.08523468158 |
| PTK2 amplification   | 0.4946650055   | 0.08544568222 |
| AKT3 deletion        | 10.58248775    | 0.08609381146 |
| HLA_DQA1_0101        | 1.448295165    | 0.08654387136 |
| H3F3A deletion       | 10.16762276    | 0.08761854298 |
| SNV in ATRX          | 5.329002489    | 0.08822866096 |
| HLA_B_4402           | 1.741640375    | 0.08914783597 |
| RET amplification    | 0.06368784432  | 0.08926650942 |
| Lab value: PTI       | 4.806807542    | 0.08972257681 |
| NFKBIZ deletion      | 0.3655016423   | 0.08977617148 |
| GATA6 amplification  | 0.3664670786   | 0.08996892522 |
| PRS: UKB_460K.pig    | 1.288058711    | 0.090142109   |
| EZH2 amplification   | 0.557674872    | 0.09059778242 |
| STAT6 amplification  | 1.602141793    | 0.09080937937 |
| CDKN2B amplification | 0.108056249    | 0.0914153669  |
| UROD deletion        | 2.481003468    | 0.09345393877 |
| PRS: MEDS_P MID3     | 1.209619647    | 0.09357057229 |
| XRCC2 amplification  | 0.3724134655   | 0.09371341093 |
| H19 deletion         | 2.831319992    | 0.094255384   |
| CD79B amplification  | 0.5406625004   | 0.0950325489  |
| RAD54B deletion      | 8.128090453    | 0.0961090609  |
| PNKP deletion        | 3.738719085    | 0.0964542084  |
| PAXIP1 amplification | 0.3765426628   | 0.09651399535 |
| SNV in PTEN          | 0.1095280502   | 0.09720108059 |
| BRCA1 deletion       | 2.240355019    | 0.09808250266 |
| Lab value: DMNEUT    | 0.9401686264   | 0.09962000499 |
| FGFR4 amplification  | 1.856037611    | 0.100754695   |
| PAX5 deletion        | 1.55975703     | 0.1013987112  |
| NOTCH2 amplification | 0.4384470419   | 0.1016554388  |
| RAD54B amplification | 0.5208354521   | 0.1017498174  |
| SNV in SMARCA4       | 6.421912533    | 0.1030657903  |
| PIK3CA deletion      | 0.248452819    | 0.1037086854  |
| SS18 deletion        | 2.501580408    | 0.1044256229  |
| ZNF708 deletion      | 2.485487631    | 0.1055731267  |
| SOX2 deletion        | 0.2126715635   | 0.1062244564  |
| TAL1 deletion        | 2.325867004    | 0.1062909055  |
| SMARCE1 deletion     | 3.438469465    | 0.1068030433  |
| SNV in CDKN2A        | 2.118233133    | 0.1073466443  |
| Lab value: TRIG      | 1.012839638    | 0.1086882129  |
| ARID1A amplification | 0.001439682594 | 0.1097630862  |
| MAP2K1 deletion      | 0.3839499477   | 0.109966931   |
| MDM4 deletion        | 8.452981815    | 0.1110168502  |
| SNV in BCORL1        | 11.55405179    | 0.1115742241  |

|                       |               |              |
|-----------------------|---------------|--------------|
| RNF8 amplification    | 0.4579930383  | 0.1125851536 |
| UBE2T amplification   | 0.4993317583  | 0.1128806326 |
| TMB_binned2           | 1.444272276   | 0.1152372152 |
| PRS: PMID27863252     | 1.172975511   | 0.1167462006 |
| HLA_B_0801            | 0.6811132887  | 0.1170249746 |
| CDKN2A amplification  | 0.03431131703 | 0.1175979173 |
| FANCA deletion        | 0.5427618478  | 0.1191636076 |
| PRS: UKB_460K.bio     | 1.187820096   | 0.1194976189 |
| SNV in ERBB4          | 2.734600831   | 0.1203804142 |
| BRCA1 amplification   | 0.4365078861  | 0.1206084923 |
| SNV in B2M            | 3.446887976   | 0.121491715  |
| Lab value: AMY        | 1.014124515   | 0.1215101605 |
| PRS: CKD_overall_E    | 1.43410216    | 0.1232957887 |
| PRS: UKB_460K.lun     | 0.8415881278  | 0.123581724  |
| FH deletion           | 8.971862957   | 0.1244166929 |
| SNV in KDM6A          | 2.497325248   | 0.1248416694 |
| BRAF deletion         | 0.2719016698  | 0.1257642374 |
| HOXB13 deletion       | 4.113098928   | 0.1260492115 |
| CYLD deletion         | 0.5469151155  | 0.1263361435 |
| NFKBIA deletion       | 1.730224382   | 0.1277828652 |
| TMB                   | 1.023056694   | 0.1283360624 |
| CTCF amplification    | 4.966895085   | 0.1283992483 |
| totalper_genes        | 0.24529636    | 0.1302080162 |
| PRS: PRSWEB_PHE       | 1.173344237   | 0.1309304075 |
| RUNX1T1 amplification | 0.5263056705  | 0.1309441763 |
| DAXX amplification    | 0.4874495042  | 0.1328429064 |
| ERBB3 amplification   | 1.526492431   | 0.1338525222 |
| CBFB amplification    | 4.758534114   | 0.134543108  |
| ABL1 deletion         | 1.669055611   | 0.1351306811 |
| PRS: UKB_460K.rep     | 0.8629191045  | 0.1352651271 |
| SDHAF2 amplification  | 0.08405596059 | 0.1357863283 |
| MYCL deletion         | 2.336241655   | 0.1364824274 |
| PRS: UKB_460K.bo      | 1.188626429   | 0.1366484401 |
| ATR amplification     | 0.1338770307  | 0.1375638043 |
| RMRP amplification    | 0.1882802466  | 0.1376978016 |
| UROD amplification    | 0.03727998327 | 0.1389957678 |
| NF2 amplification     | 0.2513317265  | 0.1390132213 |
| POLQ deletion         | 0.3833246686  | 0.1391742322 |
| RPTOR deletion        | 6.261418414   | 0.1398083995 |
| PRS: PMID27863252     | 1.149336033   | 0.1399370578 |
| POT1 amplification    | 0.4182666293  | 0.1402582878 |
| CBLB deletion         | 0.4079493278  | 0.1406624059 |
| PRS: UKB_460K.car     | 0.8819937605  | 0.1422306834 |



|                     |               |              |
|---------------------|---------------|--------------|
| SPOP deletion       | 3.751507309   | 0.1424629366 |
| RAD51D amplificati  | 0.3745611711  | 0.1430658689 |
| ARID1A deletion     | 0.5502556849  | 0.1442037099 |
| RET deletion        | 0.5770640521  | 0.1463767836 |
| SMARCB1 amplificac  | 0.3782417814  | 0.1479160453 |
| MAPK1 amplificatio  | 0.3301999589  | 0.1479672587 |
| SMAD4 amplificatio  | 0.3532792711  | 0.1492929281 |
| HLA_DQB1_0602       | 1.436659576   | 0.1504885309 |
| ETV4 amplification  | 0.4714068449  | 0.1512499896 |
| BRE amplification   | 0.06935156907 | 0.1517987489 |
| ERBB2 amplificatio  | 0.5333844239  | 0.1523638703 |
| MYB amplification   | 0.5020951577  | 0.15272354   |
| TET1 deletion       | 0.4695766784  | 0.1532651135 |
| IGF2 deletion       | 2.454389384   | 0.1537131707 |
| SF1 deletion        | 0.3451128123  | 0.1537223208 |
| MECOM deletion      | 0.03551938671 | 0.1537515815 |
| PTEN amplification  | 0.00174013901 | 0.1541756847 |
| KIF1B amplification | 0.01334552323 | 0.1546832667 |
| MBD4 deletion       | 0.2972238541  | 0.1554024385 |
| PRF1 deletion       | 0.6179517029  | 0.1569198945 |
| ARID2 amplification | 1.575690127   | 0.1581922909 |
| BCL6 deletion       | 0.3034331679  | 0.159388803  |
| SMO deletion        | 0.3060760468  | 0.1605972785 |
| TERC amplification  | 0.5571226539  | 0.1610564139 |
| PVRL4 amplificatio  | 0.5508922656  | 0.1610579538 |
| RHPN2 deletion      | 5.990116226   | 0.1637419224 |
| RHEB amplification  | 0.6129913209  | 0.1639162892 |
| PRS: TRICL.sma.HM   | 1.191992733   | 0.1647178931 |
| CDK8 deletion       | 0.3796539909  | 0.165737541  |
| CIC amplification   | 0.3556205111  | 0.1659536307 |
| NRAS amplification  | 0.3504256822  | 0.1672004304 |
| STAT3 amplification | 0.5146224695  | 0.1672304665 |
| GATA2 deletion      | 0.4043847955  | 0.1690481716 |
| MLH1 amplification  | 2.321758929   | 0.1694052013 |
| CDH1 deletion       | 0.5253432953  | 0.1700091104 |
| PPP2R1A deletion    | 3.196683391   | 0.1709527724 |
| IGF1R deletion      | 0.4502363783  | 0.1711090161 |
| PRS: PRSWEB_PHE     | 0.8626338142  | 0.1712469011 |
| TMB_rank            | 1.15356967    | 0.1716284338 |
| MYCL amplification  | 0.3275646431  | 0.171919864  |
| GEN1 amplification  | 0.2459840174  | 0.1744705073 |
| YAP1 deletion       | 0.3925406233  | 0.176567283  |
| RMRP deletion       | 1.680271351   | 0.1766908652 |

|                             |                 |              |
|-----------------------------|-----------------|--------------|
| <b>GATA6 deletion</b>       | 1.693509709     | 0.1767138417 |
| <b>PTPN11 amplificati</b>   | 1.548353912     | 0.1773709269 |
| <b>KMT2D amplificatio</b>   | 3.194497226     | 0.1776008002 |
| <b>GLI1 amplification</b>   | 1.469259454     | 0.1798546336 |
| <b>XRCC1 amplificatio</b>   | 0.3937971758    | 0.1798761458 |
| <b>MUTYH amplificatio</b>   | 0.3035189172    | 0.1828414911 |
| <b>HLA_A_0201</b>           | 1.256948489     | 0.1828729884 |
| <b>SOX9 amplification</b>   | 0.6482161297    | 0.1829474575 |
| <b>HLA_DPB1_0101</b>        | 0.5019007254    | 0.1833707199 |
| <b>HLA_C_0401</b>           | 0.7308478156    | 0.1834704265 |
| <b>MAX deletion</b>         | 2.494359067     | 0.1849259964 |
| <b>HLA_DQB1_0501</b>        | 1.347249532     | 0.1867637441 |
| <b>CREBBP deletion</b>      | 0.2479112195    | 0.1869932807 |
| <b>PRS: Stratified_left</b> | 0.8621703175    | 0.187391747  |
| <b>HLA_C_0701</b>           | 0.761855325     | 0.1881304    |
| <b>STAG1 amplificator</b>   | 1.518132386     | 0.1882544238 |
| <b>PRS: Stratified_rect</b> | 0.8711488284    | 0.1893136414 |
| <b>ETV5 deletion</b>        | 0.3068740478    | 0.1898332532 |
| <b>HLA_DRB1_0101</b>        | 1.529235284     | 0.1900012535 |
| <b>PRS: PMID27863252</b>    | 0.858067108     | 0.1907018167 |
| <b>HLA_A_2902</b>           | 1.528584742     | 0.1914934029 |
| <b>SUZ12 amplificator</b>   | 0.5778248801    | 0.1916364931 |
| <b>GREM1 amplificatio</b>   | 0.0110833975    | 0.1916433267 |
| <b>EME1 deletion</b>        | 3.104781765     | 0.1920163715 |
| <b>TSC2 deletion</b>        | 0.2707713445    | 0.1921472657 |
| <b>NTRK1 amplificatio</b>   | 0.7060782426    | 0.1928150197 |
| <b>HLA_C_0202</b>           | 1.598131492     | 0.1938864192 |
| <b>ROS1 deletion</b>        | 0.630535872     | 0.194170538  |
| <b>DEPDC5 deletion</b>      | 2.243914538     | 0.1941861839 |
| <b>RPA1 amplification</b>   | 3.18729498      | 0.1947149283 |
| <b>FANCF amplificatio</b>   | 0.1223561403    | 0.1947546752 |
| <b>PRS: TRICL.ade_ns</b>    | 1.199567794     | 0.1955126656 |
| <b>NF1 deletion</b>         | 1.838350842     | 0.1956465004 |
| <b>PRS: UKB_460K.dis</b>    | 0.8683058343    | 0.196966171  |
| <b>ID3 amplification</b>    | 0.4049863934    | 0.197104553  |
| <b>REL deletion</b>         | 0.0006961226388 | 0.1989607591 |
| <b>ZNRF3 amplificator</b>   | 0.2772878926    | 0.1990098328 |
| <b>PRPF8 amplificator</b>   | 0.1857966635    | 0.199074343  |
| <b>HLA_B_1402</b>           | 1.537832141     | 0.1993132769 |
| <b>TCEB1 amplificator</b>   | 0.5998764381    | 0.1995888387 |
| <b>HLA_A_3101</b>           | 1.824273385     | 0.2007150457 |
| <b>TERC deletion</b>        | 0.05472630791   | 0.2017791731 |
| <b>PRS: PRSWEB_PHE</b>      | 1.137170847     | 0.2019774698 |

|                      |              |              |
|----------------------|--------------|--------------|
| RHEB deletion        | 0.3114108604 | 0.2022046408 |
| FAM46C amplificati   | 0.3979824806 | 0.2023673531 |
| Lab value: T3TM      | 0.9857927273 | 0.2030590469 |
| PIM1 amplification   | 0.6362995815 | 0.2052771508 |
| HLA_B_4002           | 6.558420527  | 0.2057575065 |
| SETBP1 amplificati   | 0.4360019955 | 0.2067685785 |
| EWSR1 amplificatio   | 0.3265596262 | 0.207130614  |
| ALOX12B deletion     | 1.640316725  | 0.2087395263 |
| CDK12 deletion       | 2.329741592  | 0.209885595  |
| CHEK2 amplificatio   | 0.3903475662 | 0.2102713781 |
| CEBPA amplificatio   | 0.6364926857 | 0.211004113  |
| PRS: Stratified_LvR  | 1.144468058  | 0.2110229487 |
| BRIP1 amplification  | 0.6482360311 | 0.2126890974 |
| SMARCE1 amplifica    | 0.4332296015 | 0.2129823208 |
| MEN1 amplification   | 0.1646257654 | 0.2130637651 |
| B2M amplification    | 0.2756965046 | 0.2150508773 |
| PMS2 deletion        | 2.777890087  | 0.2157152923 |
| PRKAR1A deletion     | 3.915924132  | 0.2161219474 |
| CBL deletion         | 0.6644547475 | 0.2166429075 |
| CDKN1A amplificati   | 0.6364013107 | 0.2168012549 |
| EGLN1 amplificatio   | 0.5876667692 | 0.2173660257 |
| SRSF2 amplificatio   | 0.6393551259 | 0.2180862647 |
| IL7R amplification   | 1.885445968  | 0.2196269938 |
| PRS: Stratified_cold | 0.8752067203 | 0.2200828657 |
| HLA_DRB1_1501        | 1.429325806  | 0.2208034575 |
| HLA_DQA1_0201        | 1.338722663  | 0.2210153176 |
| CCND3 amplificatio   | 0.6909635657 | 0.2216589664 |
| IDH2 deletion        | 0.5118885114 | 0.2218136641 |
| BRCA2 amplificatio   | 0.3252875255 | 0.224431562  |
| CCNE1 deletion       | 1.928305669  | 0.2266026489 |
| PAX5 amplification   | 0.5061014664 | 0.2272899953 |
| RPTOR amplificatio   | 0.5651866969 | 0.2286951223 |
| GLI2 amplification   | 0.3622943525 | 0.2290398712 |
| BLM deletion         | 0.5034632384 | 0.2291294737 |
| PRPF40B amplificat   | 1.534085063  | 0.2292752899 |
| MAF amplification    | 4.660794803  | 0.229486636  |
| NTRK3 deletion       | 0.5122936381 | 0.2300958888 |
| RAD51D deletion      | 2.307304709  | 0.2301724051 |
| PRS: UKB_460K.car    | 0.878891924  | 0.2310632205 |
| RICTOR amplificatio  | 1.886558832  | 0.2316008528 |
| TLR4 deletion        | 1.698800929  | 0.2319623216 |
| CBFA2T3 amplificat   | 5.098910277  | 0.2323802381 |
| Lab value: PBUN      | 1.016799899  | 0.2329235651 |

|                     |                |              |
|---------------------|----------------|--------------|
| IDH1 deletion       | 1.478981464    | 0.2329833617 |
| TAL1 amplification  | 0.01141605709  | 0.2337506271 |
| PRS: BUN_overall_E  | 1.134236219    | 0.2341532018 |
| PRS: PRSWEB_PHE     | 0.8667443347   | 0.2380879962 |
| HLA_B_5001          | 3.619382843    | 0.2380911714 |
| HIST1H3C amplifica  | 0.6136380626   | 0.2385385684 |
| RAD52 deletion      | 0.2930095315   | 0.239925274  |
| CRTC1 deletion      | 2.533768074    | 0.240197143  |
| RICTOR deletion     | 0.4439647992   | 0.2408141677 |
| Lab value: ALB      | 1.413414323    | 0.2415209581 |
| WRN amplification   | 0.5140993137   | 0.2419333864 |
| NTHL1 deletion      | 0.2156312892   | 0.2426035199 |
| RPL26 deletion      | 1.638679588    | 0.2431393621 |
| SS18 amplification  | 0.2324992802   | 0.2451459214 |
| ZRSR2 deletion      | 0.1061392361   | 0.2459343389 |
| KDM6B deletion      | 1.571125973    | 0.2474774695 |
| CDK9 deletion       | 1.595215055    | 0.2475485482 |
| ALK deletion        | 0.008833916945 | 0.2475749413 |
| SDHB deletion       | 0.6447396782   | 0.2481693415 |
| Lab value: PGLU     | 0.9954286728   | 0.2489313598 |
| SMO amplification   | 0.6694423972   | 0.2509429359 |
| HLA_C_0802          | 1.45584011     | 0.251034758  |
| KAT6B deletion      | 0.5559874494   | 0.2511556602 |
| BRD3 deletion       | 2.27918948     | 0.252654871  |
| HLA_C_1601          | 1.771530996    | 0.252994078  |
| TOPBP1 deletion     | 0.354448518    | 0.2531991572 |
| ID3 deletion        | 0.6336896651   | 0.2536887536 |
| GATA4 amplification | 0.5051647277   | 0.2538558899 |
| Lab value: AEOSM    | 28.1998513     | 0.2556530849 |
| Lab value: CRE      | 1.20659424     | 0.2561325244 |
| SYK deletion        | 1.582180625    | 0.2573261421 |
| BARD1 deletion      | 2.033946718    | 0.2575302388 |
| RBBP8 amplification | 0.2322776158   | 0.2583919427 |
| Lab value: VCRE     | 1.09072988     | 0.2603510649 |
| XRCC5 deletion      | 2.021959034    | 0.260606871  |
| CTNNA1 deletion     | 0.432869805    | 0.2618629417 |
| POLQ amplification  | 0.2330523898   | 0.2622089858 |
| POLE deletion       | 3.137214684    | 0.2628626173 |
| SDHB amplification  | 0.3113225662   | 0.2648357295 |
| HLA_B_3508          | 0.08878911836  | 0.2652012983 |
| CDH4 deletion       | 3.772872799    | 0.2652429426 |
| NFE2L2 deletion     | 0.5187649092   | 0.2655119898 |
| SH2B3 amplification | 1.450715537    | 0.2661680995 |

|                            |                |              |
|----------------------------|----------------|--------------|
| <b>STAT3 deletion</b>      | 1.697637791    | 0.2662446402 |
| <b>ERBB4 deletion</b>      | 1.409914782    | 0.2668098865 |
| <b>TCF7L1 amplificatio</b> | 2.129294655    | 0.2675246938 |
| <b>PRS: UKB_460K.bl</b>    | 0.8825458153   | 0.2679902502 |
| <b>ERCC1 amplificatio</b>  | 0.4509665465   | 0.2689245489 |
| <b>PRS: UKB_460K.dis</b>   | 1.136204967    | 0.269775985  |
| <b>PRS: TRICL.nonsm</b>    | 1.142426559    | 0.2703414859 |
| <b>EZH2 deletion</b>       | 0.3292096985   | 0.2718160325 |
| <b>BMPR1A amplificati</b>  | 0.05028226249  | 0.2724784332 |
| <b>PRS: MEDS_PMI3</b>      | 0.8872572105   | 0.2735737476 |
| <b>TLX3 amplification</b>  | 1.862480248    | 0.2751978934 |
| <b>SMAD2 amplificatio</b>  | 0.4869679903   | 0.2756273123 |
| <b>HNF1A deletion</b>      | 1.681430628    | 0.277234679  |
| <b>NPRL3 deletion</b>      | 0.3156146521   | 0.2775444034 |
| <b>FAS amplification</b>   | 0.002485563618 | 0.2776306504 |
| <b>CCND1 deletion</b>      | 0.3209625121   | 0.2783781537 |
| <b>Lab value: TP</b>       | 0.7870246319   | 0.2791211953 |
| <b>Lab value: EGFR</b>     | 0.9917603753   | 0.2791809483 |
| <b>PRS: PRSWEB_PHE</b>     | 1.120260115    | 0.2802865687 |
| <b>MET deletion</b>        | 0.4098036097   | 0.2803308685 |
| <b>SNV in TSC1</b>         | 5.949158491    | 0.2807935251 |
| <b>CADM2 deletion</b>      | 0.5440864788   | 0.2810195963 |
| <b>FGFR1 deletion</b>      | 1.373848304    | 0.2815100984 |
| <b>SQSTM1 deletion</b>     | 1.872703081    | 0.2821977343 |
| <b>KDM6A amplificatio</b>  | 0.06604511659  | 0.2823198986 |
| <b>JAK1 amplification</b>  | 0.02660882724  | 0.2834691678 |
| <b>FANCE amplificatio</b>  | 0.6808762457   | 0.2835410997 |
| <b>ERCC1 deletion</b>      | 2.860465194    | 0.2835828134 |
| <b>CSF3R amplificatio</b>  | 0.3919159337   | 0.2847950311 |
| <b>RINT1 amplification</b> | 0.5406436159   | 0.2855681872 |
| <b>NFKBIE amplificatio</b> | 0.6545895035   | 0.2859236807 |
| <b>NF1 amplification</b>   | 0.5921352188   | 0.2862547481 |
| <b>DIS3L2 deletion</b>     | 1.950025707    | 0.2864633189 |
| <b>RB1 deletion</b>        | 0.6739276861   | 0.2889180468 |
| <b>TOPBP1 amplificati</b>  | 0.2951863387   | 0.2900227785 |
| <b>ARHGEF12 amplific</b>   | 0.1969998029   | 0.290443196  |
| <b>CDK6 amplification</b>  | 0.7066298676   | 0.2905802368 |
| <b>HMBS amplification</b>  | 0.1974054411   | 0.2910567662 |
| <b>BUB1B amplificatio</b>  | 0.4054664182   | 0.2918036014 |
| <b>CDK2 amplification</b>  | 1.481899589    | 0.2918657374 |
| <b>PRS: RCC</b>            | 0.8779401163   | 0.2920411154 |
| <b>EPHA7 deletion</b>      | 0.4346586675   | 0.2924940144 |
| <b>SLX1B deletion</b>      | 2.416620278    | 0.2938313136 |

|                    |                |              |
|--------------------|----------------|--------------|
| SNV in VHL         | 2.067500268    | 0.2939917781 |
| SDHD deletion      | 0.7263936587   | 0.2942849462 |
| SNV in BRCA2       | 2.323958942    | 0.2949855337 |
| Lab value: MMONO   | 1.122978935    | 0.2950423369 |
| PRS: UKB_460K.blo  | 0.8944796799   | 0.2956965045 |
| MTOR deletion      | 0.675797022    | 0.2961210148 |
| STAG2 amplificati  | 0.1345420099   | 0.29690737   |
| H3F3B amplificati  | 0.6170508574   | 0.2974494248 |
| CUX1 amplificati   | 0.6902845296   | 0.2984116046 |
| PALB2 deletion     | 0.3129717277   | 0.2989837108 |
| PRS: PMID2786325   | 0.8871690128   | 0.2997668118 |
| CCND1 amplificati  | 0.6677919091   | 0.2997836927 |
| DDR2 deletion      | 4.681141837    | 0.3007882406 |
| SDHC deletion      | 4.681141837    | 0.3007882406 |
| RARA amplificati   | 0.6181391064   | 0.3029813357 |
| PDGFRB deletion    | 0.6181919952   | 0.3040485368 |
| ATR deletion       | 0.4085612464   | 0.3041494179 |
| KIT deletion       | 1.476884354    | 0.3050158413 |
| KLLN amplificati   | 0.02941788368  | 0.305202283  |
| CDKN1B deletion    | 1.443462893    | 0.305778283  |
| QKI amplificati    | 0.3106271335   | 0.3059936392 |
| Lab value: UWBC    | 0.9531313778   | 0.306153542  |
| SNV in MSH2        | 6.29106312     | 0.3076423905 |
| SMC3 amplificati   | 0.001200544225 | 0.3088032685 |
| HRAS deletion      | 0.5946840595   | 0.3088775634 |
| RHOT1 amplificati  | 0.5862985839   | 0.3103892519 |
| PRS: PMID2786325   | 0.8805437272   | 0.3107462782 |
| PDGFRA deletion    | 1.47164388     | 0.3119178987 |
| ELANE deletion     | 0.2334155325   | 0.3122181246 |
| IL7R deletion      | 0.4888053919   | 0.3126295858 |
| RAD50 deletion     | 0.4798768231   | 0.3142875441 |
| CALR deletion      | 0.1025326734   | 0.3145532931 |
| ARID1B amplificati | 0.3364351264   | 0.3145899358 |
| ERCC6 amplificati  | 0.1329991098   | 0.3148190819 |
| GSTM5 deletion     | 0.533391705    | 0.3186599725 |
| PHF6 deletion      | 0.1732884207   | 0.3196527458 |
| PRS: PRSWEB_PHE    | 1.122051841    | 0.321794617  |
| ETV1 deletion      | 2.328230441    | 0.3225713503 |
| PARK2 amplificati  | 0.3543322699   | 0.3226638322 |
| CRLF2 deletion     | 0.2752381409   | 0.3234114981 |
| RAD51C deletion    | 2.726166473    | 0.3235130846 |
| SF3B1 amplificati  | 0.6092216849   | 0.3239878237 |
| SLC25A13 amplifica | 0.59926649     | 0.3248894161 |

|                      |                |              |
|----------------------|----------------|--------------|
| Lab value: MLYMPH    | 1.045190513    | 0.324920372  |
| PTPN14 amplification | 0.6728987111   | 0.3258147596 |
| EME1 amplification   | 0.5803683583   | 0.3264963119 |
| PTPN11 deletion      | 1.618525976    | 0.3266841724 |
| MAP2K2 amplification | 0.1717437309   | 0.3270023534 |
| KLLN deletion        | 0.6251486351   | 0.3282794653 |
| PPM1D deletion       | 2.879977866    | 0.3284965639 |
| CDK1 deletion        | 0.559924387    | 0.3286557627 |
| PDGFRB amplification | 1.64441642     | 0.3287811128 |
| PRS: MEDS_P MID3     | 1.112738751    | 0.329212862  |
| STAG2 deletion       | 0.09880030443  | 0.3301297121 |
| GALNT12 deletion     | 2.072150907    | 0.3303212548 |
| Lab value: SGPT      | 0.9945987103   | 0.3304923334 |
| SUFU amplification   | 0.002262188989 | 0.3306968549 |
| PRS: UKB_460K.cover  | 0.8686280379   | 0.3308994821 |
| ATM amplification    | 0.2640272499   | 0.3323108148 |
| BUB1B deletion       | 0.7001504271   | 0.3328468371 |
| POLH amplification   | 0.6835957882   | 0.3328521592 |
| PRS: UKB_460K.cover  | 1.118670603    | 0.3332091459 |
| POT1 deletion        | 0.3641115218   | 0.333529881  |
| PRF1 amplification   | 0.1054682565   | 0.3337005788 |
| KDR deletion         | 1.433292288    | 0.3340614753 |
| CBL amplification    | 0.3652875708   | 0.335233964  |
| Lab value: MONO      | 1.034242597    | 0.3357354663 |
| SLX4 deletion        | 0.08374491936  | 0.335764289  |
| BCORL1 deletion      | 0.1480888447   | 0.3360260228 |
| SETD2 amplification  | 1.853584451    | 0.3366910022 |
| FOXL2 amplification  | 0.358563273    | 0.3369025866 |
| BRD3 amplification   | 0.4712079691   | 0.3370576533 |
| NOTCH3 deletion      | 0.02247080579  | 0.3371118783 |
| AR deletion          | 0.0534364609   | 0.3372021117 |
| PRS: PRSWEB_PHE      | 1.113207603    | 0.33827655   |
| MET amplification    | 0.7312530742   | 0.338780465  |
| FAH deletion         | 0.3910636024   | 0.3389550694 |
| PRS: Stratified_mal  | 0.9009270913   | 0.3405364733 |
| HNF1A amplification  | 1.372195223    | 0.341072612  |
| PNRC1 deletion       | 0.4590608012   | 0.3412096994 |
| TRAF7 deletion       | 0.09000721047  | 0.3421471345 |
| PMS2 amplification   | 0.772565303    | 0.3422495631 |
| RSPO3 amplification  | 2.079740844    | 0.3428158115 |
| TET2 deletion        | 1.347325682    | 0.3433967255 |
| TRAF7 amplification  | 2.049248967    | 0.3436510248 |
| PSMD13 deletion      | 0.01399546177  | 0.3439108357 |

|                      |               |              |
|----------------------|---------------|--------------|
| PRS: PMID27863252    | 0.8911789398  | 0.344315832  |
| HLA_DRB1_0701        | 1.256677366   | 0.3444227705 |
| IDH2 amplification   | 0.5571700928  | 0.3444683195 |
| FUS deletion         | 0.2494557579  | 0.345168764  |
| HLA_C_0303           | 0.7012153858  | 0.3461249075 |
| RHOH deletion        | 1.665784986   | 0.3462130756 |
| PRS: PMID27863252    | 0.8917221619  | 0.3473208156 |
| PRS: TRICL.ade1_n    | 1.132411648   | 0.3480398954 |
| USP8 deletion        | 0.6131346343  | 0.3480618951 |
| CDK12 amplification  | 0.5704370042  | 0.349327255  |
| SNV in SMAD4         | 0.08730591715 | 0.350308733  |
| SNV in ASXL1         | 1.984344666   | 0.3503791053 |
| XRCC3 amplification  | 0.1547168152  | 0.3504840144 |
| Lab value: PLT       | 0.9988997381  | 0.3514306569 |
| RB1 amplification    | 0.4209950923  | 0.3517021565 |
| EP300 amplification  | 0.6062135083  | 0.3523608262 |
| PIK3C2B deletion     | 2.076009186   | 0.3523863044 |
| NEIL1 deletion       | 0.4092816285  | 0.3525002001 |
| FAM175A deletion     | 1.905151665   | 0.3527105366 |
| USP28 amplification  | 0.2372668017  | 0.3528950819 |
| NEGR1 deletion       | 0.4944538636  | 0.353010491  |
| GNAQ deletion        | 1.345923348   | 0.3542108352 |
| H3F3A amplification  | 0.7794786106  | 0.3547429855 |
| RNF43 deletion       | 2.54695779    | 0.3551111576 |
| NEIL1 amplification  | 2.127888014   | 0.3554772763 |
| PRS: PRSWEB_PHE      | 0.9021185124  | 0.3561969058 |
| ARID1B deletion      | 0.744572962   | 0.3563621008 |
| KCNIP1 deletion      | 1.679275998   | 0.3574524124 |
| PRS: UKB_460K.dis    | 0.8991843983  | 0.3580124024 |
| PRS: UKB_460K.pig    | 1.10448834    | 0.3580569153 |
| ITK deletion         | 0.4798005915  | 0.3591838549 |
| PRS: Stratified_prox | 0.9108582795  | 0.3594339847 |
| JAK2 deletion        | 1.251844968   | 0.361054435  |
| Lab value: ALK       | 0.9984385704  | 0.3618962762 |
| PRS: UKB_460K.bo     | 0.9009687196  | 0.3622428533 |
| KMT2A amplification  | 0.2748536636  | 0.3651064411 |
| HLA_DQB1_0604        | 1.690715928   | 0.3652046691 |
| EGFR deletion        | 2.00869932    | 0.3669390586 |
| HLA_DQB1_0202        | 1.296332531   | 0.3684680889 |
| MITF amplification   | 0.5890856881  | 0.3684910921 |
| CRKL amplification   | 0.6550008539  | 0.370158984  |
| PNKP amplification   | 0.2702876518  | 0.3701630769 |
| SNV in NF1           | 1.280860456   | 0.3709328261 |



|                       |                 |              |
|-----------------------|-----------------|--------------|
| MUS81 amplification   | 0.202815878     | 0.371233371  |
| SNV in FAT1           | 2.689319447     | 0.3716454742 |
| PRS: BreastCancer     | 1.13369127      | 0.3719538599 |
| RUNX1 amplification   | 0.658065282     | 0.3720964851 |
| NT5C2 amplification   | 0.0005644113314 | 0.3732765211 |
| BCOR amplification    | 0.05948357644   | 0.3740710261 |
| RHBDF2 amplification  | 0.6633978279    | 0.3770512829 |
| NF2 deletion          | 1.415891946     | 0.3794566227 |
| TNFAIP3 amplification | 0.5791024045    | 0.3795783835 |
| SNV in RB1            | 0.005466486977  | 0.3810461751 |
| ATRX deletion         | 0.03851494441   | 0.3811961853 |
| MSH6 amplification    | 0.611499279     | 0.3814496967 |
| ERCC4 deletion        | 0.1870204644    | 0.3815531807 |
| SNV in ATM            | 0.4481498317    | 0.3815697178 |
| SDHC amplification    | 0.8001153276    | 0.3844762656 |
| ENG amplification     | 0.5006230055    | 0.384740901  |
| TRIM37 amplification  | 0.6622151557    | 0.3850178853 |
| Lab value: URBC       | 1.052878965     | 0.3872658724 |
| SNV in NOTCH1         | 1.683567984     | 0.3877095166 |
| EWSR1 deletion        | 1.404040823     | 0.3878222149 |
| CHEK1 amplification   | 0.198978903     | 0.3882435318 |
| XRCC5 amplification   | 2.222432095     | 0.3888452148 |
| HLA_C_0304            | 1.30700056      | 0.3890380071 |
| TMB_binned1           | 0.7945635592    | 0.3891970577 |
| ATM deletion          | 0.7740987304    | 0.3899897666 |
| NPRL2 deletion        | 0.6660915765    | 0.3906113755 |
| CHEK1 deletion        | 0.6422445544    | 0.3911012826 |
| ABL1 amplification    | 0.5745809104    | 0.391400854  |
| Lab value: FRT4M      | 1.836621986     | 0.3915633938 |
| TCEB1 deletion        | 0.1095071809    | 0.3922367004 |
| BAP1 amplification    | 0.3625213029    | 0.3927812127 |
| CUX1 deletion         | 0.4685070477    | 0.3929519332 |
| SMAD4 deletion        | 1.299008154     | 0.3932266344 |
| HLA_B_1401            | 0.001954841398  | 0.3935513531 |
| PRS: PMID27863252     | 1.09104877      | 0.3936464434 |
| TAZ amplification     | 0.2924534457    | 0.3942537966 |
| HFE amplification     | 0.6852424438    | 0.3960193741 |
| PRS: PRSWEB_PHE       | 0.9160719334    | 0.3961214369 |
| ALK amplification     | 0.6100214266    | 0.3974065009 |
| CD274 deletion        | 1.231691098     | 0.3988140039 |
| CDK4 deletion         | 1.532835304     | 0.3988517438 |
| RUNX1T1 deletion      | 2.505844971     | 0.3988817539 |
| NOTCH3 amplification  | 0.08782611136   | 0.3992809704 |

|                             |               |              |
|-----------------------------|---------------|--------------|
| <b>FBXW7 amplification</b>  | 0.1933382885  | 0.3995237078 |
| <b>KDM5C amplification</b>  | 0.1174761463  | 0.399606827  |
| <b>HLA_B_1501</b>           | 0.6788343536  | 0.4006125205 |
| <b>GNB2L1 amplification</b> | 2.130413888   | 0.4008833981 |
| <b>PRS: UKB_460K.rep</b>    | 1.120997356   | 0.4018209575 |
| <b>HLA_A_3001</b>           | 1.802785869   | 0.402112953  |
| <b>PHF6 amplification</b>   | 0.3238813775  | 0.4021393675 |
| <b>GPC3 deletion</b>        | 0.2252503707  | 0.4021500569 |
| <b>UIMC1 deletion</b>       | 0.5186771598  | 0.4022817606 |
| <b>Lab value: GGTL</b>      | 0.974619683   | 0.4044061122 |
| <b>NFKBIA amplification</b> | 0.6007467402  | 0.4049122519 |
| <b>RPA1 deletion</b>        | 0.731689467   | 0.405505163  |
| <b>ARAF amplification</b>   | 0.04278916491 | 0.4067397699 |
| <b>BABAM1 deletion</b>      | 0.1621573857  | 0.4069662194 |
| <b>DDR2 amplification</b>   | 0.8074966432  | 0.4074347286 |
| <b>RBL2 amplification</b>   | 0.08882347368 | 0.4096201724 |
| <b>HLA_B_5101</b>           | 0.6932806766  | 0.4111056418 |
| <b>EGLN1 deletion</b>       | 3.686610908   | 0.411434798  |
| <b>FAN1 amplification</b>   | 0.06368745459 | 0.412569869  |
| <b>ESR1 amplification</b>   | 0.5839646959  | 0.4133107683 |
| <b>PRS: PMID27863252</b>    | 0.9177833805  | 0.413329351  |
| <b>NT5C2 deletion</b>       | 0.6962823718  | 0.4141880874 |
| <b>PRS: PRSWEB_PHE</b>      | 0.9135887825  | 0.4162859749 |
| <b>DCLRE1C deletion</b>     | 0.6905082046  | 0.4164473131 |
| <b>PRS: PRSWEB_PHE</b>      | 0.9149945921  | 0.4174516312 |
| <b>CCNE1 amplification</b>  | 0.7629518488  | 0.4181365788 |
| <b>MTAP deletion</b>        | 0.7529348518  | 0.4183534194 |
| <b>DDB1 amplification</b>   | 0.1904520844  | 0.4184645698 |
| <b>VEGFA amplification</b>  | 0.7331866978  | 0.4185727779 |
| <b>PRS: UKB_460K.rep</b>    | 1.096308459   | 0.4203316194 |
| <b>SH2B3 deletion</b>       | 1.489388922   | 0.4207050125 |
| <b>ARHGEF12 deletion</b>    | 0.6402357939  | 0.4207592199 |
| <b>HABP2 deletion</b>       | 0.682382063   | 0.4217549095 |
| <b>SMARCB1 deletion</b>     | 1.383359224   | 0.4224957407 |
| <b>AXL deletion</b>         | 1.691725521   | 0.4234140407 |
| <b>TAL2 deletion</b>        | 1.831501005   | 0.4239990411 |
| <b>MITF deletion</b>        | 0.7622300268  | 0.4241152659 |
| <b>SNV in SETD2</b>         | 1.491993814   | 0.4247949476 |
| <b>EPHA3 deletion</b>       | 0.6890039338  | 0.4249086486 |
| <b>EPCAM amplification</b>  | 1.956253194   | 0.4249666301 |
| <b>U2AF1 amplification</b>  | 0.6214195074  | 0.4262389044 |
| <b>TSC1 amplification</b>   | 0.6076141682  | 0.4262779301 |
| <b>AKT2 deletion</b>        | 1.66415995    | 0.4263864762 |

|                      |              |              |
|----------------------|--------------|--------------|
| PRS: PMID27863252    | 0.9103739484 | 0.4277195902 |
| CDK2 deletion        | 2.140105363  | 0.4284445577 |
| RELA amplification   | 0.237530616  | 0.4285144717 |
| PRS: PRSWEB_PHE      | 0.9106740424 | 0.4292077716 |
| BRE deletion         | 0.0171086929 | 0.4299394471 |
| APC amplification    | 1.603254505  | 0.4299457723 |
| PRS: MEDS_PMD3       | 0.9163977161 | 0.430082262  |
| CDC73 amplification  | 0.8164544443 | 0.4303360018 |
| FLT3 deletion        | 0.7282594616 | 0.4326015241 |
| IDH1 amplification   | 0.6125718233 | 0.4335419895 |
| PRS: PMID27863252    | 0.923028857  | 0.4357013787 |
| PRS: TRICL.ade.HM    | 0.9104779391 | 0.4361872281 |
| Lab value: MEOS      | 1.297024852  | 0.4363400994 |
| DDB2 amplification   | 0.2107723461 | 0.4365283618 |
| KLF2 deletion        | 0.2290971297 | 0.4371737003 |
| PRS: PMID27863252    | 0.9066257077 | 0.4374636943 |
| HLA_DPB1_0402        | 0.7355995955 | 0.4376666465 |
| MAP3K1 amplification | 1.622631438  | 0.4380519526 |
| SDHD amplification   | 0.4471520925 | 0.4381623349 |
| NSD1 deletion        | 0.5459883718 | 0.4401778072 |
| RNF43 amplification  | 0.6787395513 | 0.4412293962 |
| PARK2 deletion       | 0.7908906934 | 0.4413157368 |
| FAT1 deletion        | 0.5497951782 | 0.4413957966 |
| CHEK2 deletion       | 1.351107475  | 0.4433811771 |
| PRS: UKB_460K.bl     | 1.093824042  | 0.4433824886 |
| CARD11 deletion      | 1.863307334  | 0.4439837028 |
| MYD88 amplification  | 1.546763423  | 0.4455969153 |
| EXO1 deletion        | 3.490069952  | 0.4458428552 |
| TCF3 deletion        | 0.6112553247 | 0.4463586209 |
| NFE2L2 amplification | 0.6605335653 | 0.446680591  |
| RAD51C amplification | 0.6961043944 | 0.4469240525 |
| PRS: PRSWEB_PHE      | 0.930056913  | 0.4478798625 |
| NSD1 amplification   | 1.490597613  | 0.4485334012 |
| BARD1 amplification  | 2.553053083  | 0.4488056368 |
| ZNRF3 deletion       | 1.572331874  | 0.4488220997 |
| SPOP amplification   | 0.6573359936 | 0.4505687428 |
| Lab value: CEA       | 0.9513954206 | 0.4507646994 |
| PRS: X20171017_M     | 1.085273778  | 0.4518114703 |
| CDK4 amplification   | 1.252661485  | 0.4520271662 |
| PRS: PGS000194_pl    | 0.9207601597 | 0.4536327676 |
| PRS: PGS000195_pl    | 0.9207601597 | 0.4536327676 |
| PRS: PGS000196_pl    | 0.9207601597 | 0.4536327676 |
| PRS: PGS000197_pl    | 0.9207601597 | 0.4536327676 |

|                        |                |              |
|------------------------|----------------|--------------|
| PRS: PGS000198_pl      | 0.9207601597   | 0.4536327676 |
| PRS: PGS000199_pl      | 0.9207601597   | 0.4536327676 |
| Lab value: MCV         | 1.012267503    | 0.4542981389 |
| PRS: UKB_460K.dis      | 1.08430652     | 0.4548202703 |
| MDM2 amplification     | 1.248432073    | 0.4557625292 |
| SNV in ROS1            | 2.442877528    | 0.4571739809 |
| PRS: PRSWEB_PHE        | 0.9188157453   | 0.4578563849 |
| IKZF3 amplification    | 0.6053258359   | 0.4585442315 |
| WHSC1 amplification    | 1.563680283    | 0.4591876629 |
| SBDS deletion          | 0.486247859    | 0.4596616078 |
| PPM1D amplification    | 0.6983609457   | 0.46033837   |
| CYLD amplification     | 0.6003826911   | 0.4606137136 |
| AXIN2 amplification    | 0.7015561816   | 0.4608124328 |
| HABP2 amplification    | 0.009578735356 | 0.4613305723 |
| CBFB deletion          | 0.6526433787   | 0.4621167953 |
| JAZF1 deletion         | 0.04614446882  | 0.462192506  |
| KLF4 deletion          | 1.662616415    | 0.4624839378 |
| MAPK1 deletion         | 1.390076317    | 0.4625455931 |
| PRS: UKB_460K.pig      | 1.124387197    | 0.4627762646 |
| SH2D1A amplification   | 0.278016956    | 0.4645039993 |
| HMBS deletion          | 0.677814291    | 0.4659621493 |
| WT1 amplification      | 0.3190673664   | 0.4663146154 |
| CDK5 deletion          | 0.06285669593  | 0.4663966792 |
| HLA_DRB1_0401          | 0.7544641441   | 0.4668592594 |
| PML deletion           | 0.5014907613   | 0.4675133608 |
| HIST1H3B amplification | 0.7325183135   | 0.4677048236 |
| SNV in ARID1A          | 1.165697183    | 0.4680352196 |
| RSPO3 deletion         | 0.752050842    | 0.4684456897 |
| XPO1 amplification     | 0.6774288465   | 0.4696388592 |
| TDG deletion           | 0.5467734124   | 0.4701329417 |
| KDM6A deletion         | 0.2749417127   | 0.4727755253 |
| TP53BP1 deletion       | 0.7064478194   | 0.4730749037 |
| EXO1 amplification     | 0.7370747276   | 0.4742355682 |
| ITK amplification      | 1.760467506    | 0.4744998009 |
| ESR1 deletion          | 0.797282359    | 0.4761012958 |
| FANCD2 amplification   | 0.6595407777   | 0.476131827  |
| SLX4 amplification     | 1.707588021    | 0.4775936513 |
| TERT amplification     | 1.215329243    | 0.4778936174 |
| CD58 deletion          | 0.648788785    | 0.4779631186 |
| ETV1 amplification     | 0.8252992991   | 0.4781860949 |
| PRS: UKB_460K.blo      | 1.09666187     | 0.4782447703 |
| MGA deletion           | 0.713228832    | 0.4787152665 |
| MYB deletion           | 0.7989924415   | 0.4789478299 |

|                      |                |              |
|----------------------|----------------|--------------|
| PRS: PMID27863252    | 0.9300409783   | 0.4794882964 |
| DEPDC5 amplification | 0.009277465758 | 0.4795708169 |
| SNV in APC           | 1.303182924    | 0.4805563455 |
| HLA_DRB1_0301        | 0.8469789734   | 0.480674541  |
| FANCB deletion       | 0.2826160364   | 0.4815823902 |
| SNV in TET2          | 2.123278272    | 0.4819772935 |
| PHOX2B amplification | 0.5830680177   | 0.482015225  |
| NOTCH1 amplification | 0.6162783957   | 0.4831254553 |
| KEAP1 amplification  | 0.7025267022   | 0.4837355836 |
| FLT1 deletion        | 0.7551756849   | 0.4839123044 |
| TRAF3 amplification  | 0.1185543729   | 0.4845586594 |
| Lab value: ABASO     | 16.23699443    | 0.4849639629 |
| TRIM37 deletion      | 1.956431453    | 0.4853059064 |
| SLX1A deletion       | 1.970505511    | 0.4860722389 |
| LIG4 amplification   | 0.5750793387   | 0.4863785483 |
| NTRK3 amplification  | 0.6150640731   | 0.4893593909 |
| NEIL3 amplification  | 0.6308151731   | 0.4899612738 |
| MEN1 deletion        | 0.591231799    | 0.4917849717 |
| SMC3 deletion        | 0.7892933345   | 0.4920702843 |
| PDCD1LG2 deletion    | 1.18681532     | 0.4932446322 |
| HLA_C_1701           | 0.06511811093  | 0.4936692462 |
| SUFU deletion        | 0.8070440657   | 0.4940441719 |
| AKT3 amplification   | 0.8301198492   | 0.4975541126 |
| PBRM1 amplification  | 0.442867119    | 0.4977732326 |
| CEBPA deletion       | 1.469268012    | 0.4985805831 |
| PRDM1 amplification  | 1.33074568     | 0.4991489037 |
| PRS: Stratified_dist | 0.9256840765   | 0.4993417516 |
| GPC3 amplification   | 0.3961807265   | 0.4994061633 |
| KIF1B deletion       | 1.347804612    | 0.5000028785 |
| SLITRK6 deletion     | 0.6726222648   | 0.5001047769 |
| RAD51 deletion       | 0.7239500187   | 0.5003619231 |
| TSHR deletion        | 0.5916363549   | 0.5016684531 |
| HLA_C_0501           | 1.249941374    | 0.5028720915 |
| EXT2 deletion        | 0.6646085542   | 0.5031339424 |
| NTHL1 amplification  | 1.613824471    | 0.5033676543 |
| SOX9 deletion        | 2.044981267    | 0.5034108629 |
| CDKN1B amplification | 1.232709768    | 0.5037952382 |
| TLX3 deletion        | 0.5974628962   | 0.5040226489 |
| KMT2A deletion       | 0.7004692727   | 0.5045460356 |
| SOCS1 deletion       | 0.6062023717   | 0.505273278  |
| SRSF2 deletion       | 2.062162723    | 0.5063775333 |
| MAP2K2 deletion      | 0.3553569386   | 0.5068916026 |
| MRE11A amplification | 0.4650936023   | 0.5100149378 |

|                              |                 |              |
|------------------------------|-----------------|--------------|
| <b>DIS3 amplification</b>    | 0.7145912364    | 0.5102303613 |
| <b>GATA3 amplification</b>   | 0.6848014827    | 0.510373062  |
| <b>KDM5A deletion</b>        | 0.5981454788    | 0.5111617684 |
| <b>RARA deletion</b>         | 1.377430003     | 0.5118635414 |
| <b>PRS: GSCAN.Drinks</b>     | 1.069156069     | 0.5123087978 |
| <b>SNV in BCOR</b>           | 0.002869419024  | 0.5124516019 |
| <b>USP28 deletion</b>        | 0.7160144998    | 0.5149284803 |
| <b>PTPRD deletion</b>        | 1.283710955     | 0.5151089134 |
| <b>ASXL1 deletion</b>        | 0.0003367107326 | 0.5160008858 |
| <b>PRS: PMID27863252</b>     | 0.9270204622    | 0.5165610507 |
| <b>CSF3R deletion</b>        | 0.7404095517    | 0.5185626933 |
| <b>DKC1 amplification</b>    | 1.733808434     | 0.5188521368 |
| <b>AKT1 amplification</b>    | 1.340243434     | 0.5188977072 |
| <b>HLA_C_0102</b>            | 0.7629590591    | 0.5192547043 |
| <b>HLA_B_3501</b>            | 0.7280163771    | 0.5192721784 |
| <b>PRS: PMID27863252</b>     | 0.93789413      | 0.5196874083 |
| <b>NFKBIZ amplification</b>  | 0.738063591     | 0.5197155167 |
| <b>PRS: UKB_460K.cov</b>     | 1.072779234     | 0.5197595315 |
| <b>PPP2R1A amplification</b> | 0.629938108     | 0.5198541171 |
| <b>PRS: TRICL.sqc.HM</b>     | 1.101116885     | 0.5201444425 |
| <b>LMO1 deletion</b>         | 1.334484535     | 0.5202749122 |
| <b>MCL1 deletion</b>         | 2.518404057     | 0.5220322437 |
| <b>SOX2 amplification</b>    | 1.182657875     | 0.5227926601 |
| <b>AXL amplification</b>     | 0.7670315458    | 0.5243993315 |
| <b>ERCC2 deletion</b>        | 0.6654094424    | 0.5248004753 |
| <b>INSIG1 deletion</b>       | 0.1079199324    | 0.5255097735 |
| <b>PRS: PRSWEB_PHE</b>       | 0.9376562361    | 0.5258484823 |
| <b>MAF deletion</b>          | 0.7165442534    | 0.5267266937 |
| <b>MAP2K1 amplification</b>  | 0.6774841856    | 0.5278766873 |
| <b>NEIL3 deletion</b>        | 0.5748475947    | 0.5301338164 |
| <b>XRCC6 deletion</b>        | 0.5786658646    | 0.5307119204 |
| <b>MDM4 amplification</b>    | 0.8521455334    | 0.5312310594 |
| <b>TCF7L2 deletion</b>       | 0.80702615      | 0.5312815503 |
| <b>ATRX amplification</b>    | 0.04433854743   | 0.5322049159 |
| <b>PRS: GSCAN.AgeOf</b>      | 1.07894249      | 0.5324785012 |
| <b>FOXA1 amplification</b>   | 1.395523417     | 0.5330693789 |
| <b>Lab value: CA125</b>      | 0.9979316624    | 0.5334206721 |
| <b>MYBL1 deletion</b>        | 1.570166191     | 0.5338429611 |
| <b>ENG deletion</b>          | 1.551285115     | 0.5342022731 |
| <b>ZNF217 amplification</b>  | 0.8239505158    | 0.5347124293 |
| <b>PRS: MEDS_PMD3</b>        | 1.070955218     | 0.5352695118 |
| <b>Lab value: MALYM</b>      | 1.938081042     | 0.5355580193 |
| <b>PRAME amplification</b>   | 0.04765516035   | 0.5356273891 |

|                        |                |              |
|------------------------|----------------|--------------|
| HLA_A_2402             | 0.8345949662   | 0.5356886036 |
| IGF1R amplification    | 0.6692678808   | 0.5366177922 |
| TAL2 amplification     | 0.6018361143   | 0.5373938214 |
| SF1 amplification      | 0.0881491503   | 0.5374221784 |
| Lab value: NEUT        | 0.9926974719   | 0.5376377104 |
| MTOR amplification     | 0.6456125947   | 0.539514222  |
| IKZF3 deletion         | 1.537603935    | 0.5403128788 |
| RIF1 deletion          | 0.1614415145   | 0.5406804938 |
| NR0B1 amplification    | 0.01998630971  | 0.5408549958 |
| PRPF8 deletion         | 1.335992952    | 0.5411327122 |
| BMPR1A deletion        | 0.8177301041   | 0.5415533143 |
| PRS: Asthma.adults     | 0.9341774615   | 0.541598915  |
| XRCC4 deletion         | 0.6837833174   | 0.5418443646 |
| PRS: BRCA.ERNEG        | 1.069175946    | 0.5420088061 |
| EPHA7 amplification    | 1.392389873    | 0.5443419458 |
| STAG1 deletion         | 0.001259157264 | 0.5454174056 |
| TDG amplification      | 1.383720319    | 0.5459963501 |
| VHL amplification      | 0.7035537814   | 0.5463094039 |
| ARHGAP35 amplification | 1.582033396    | 0.5469783554 |
| TMEM127 amplification  | 0.5912726364   | 0.5471562682 |
| DMC1 amplification     | 0.6987509462   | 0.5474961872 |
| PRS: PRSWEB_PHE        | 0.9361774136   | 0.5475959512 |
| MAP3K1 deletion        | 1.219561182    | 0.5476721902 |
| BRIP1 deletion         | 1.776377975    | 0.5480725707 |
| PRS: MEDS_PMI3         | 1.077188726    | 0.5511773327 |
| RIF1 amplification     | 2.17304831     | 0.5519262941 |
| VHL deletion           | 0.7813170961   | 0.5526727993 |
| PTEN deletion          | 0.823939506    | 0.5530535959 |
| RAF1 deletion          | 0.7788948441   | 0.5535276066 |
| PRS: PRSWEB_PHE        | 0.9286002573   | 0.5539864329 |
| PRS: PMID27863252      | 1.068843782    | 0.5540805273 |
| XRCC4 amplification    | 1.675292228    | 0.5545578215 |
| PRS: PMID27863252      | 0.940589635    | 0.5548029795 |
| PRPF40B deletion       | 1.664949875    | 0.5549296934 |
| HLA_DPB1_0301          | 1.211583537    | 0.5549851569 |
| MTA1 amplification     | 0.3007602258   | 0.5551459532 |
| SLX1A amplification    | 0.01604681575  | 0.5555184618 |
| DOCK8 amplification    | 0.5877092035   | 0.5556246063 |
| MRE11A deletion        | 0.6791278829   | 0.556094356  |
| PRS: UKB_460K.rep      | 1.076255101    | 0.5574767048 |
| DMC1 deletion          | 0.5730363937   | 0.5600138486 |
| FANCD2 deletion        | 0.7857687454   | 0.5614771179 |
| RASA1 amplification    | 1.676347348    | 0.5629063157 |

|                       |                |              |
|-----------------------|----------------|--------------|
| PRS: PRSWEB_PHE       | 1.050689296    | 0.564728347  |
| XRCC6 amplification   | 0.7041273681   | 0.5654386191 |
| MTAP amplification    | 0.46297413     | 0.5660344763 |
| KLF4 amplification    | 0.6472360984   | 0.5663772253 |
| BRCA2 deletion        | 0.7987750693   | 0.5677069023 |
| HLA_B_5301            | 0.002261315501 | 0.5680603323 |
| PRS: UKB_460K.blog    | 0.9454199101   | 0.5684231884 |
| INSIG1 amplification  | 1.299068151    | 0.5689994079 |
| BCOR deletion         | 0.3055448326   | 0.5692694953 |
| TNFAIP3 deletion      | 0.8355421096   | 0.5703460902 |
| SDHAF2 deletion       | 0.6407202649   | 0.5706961886 |
| Lab value: SGOT       | 0.9960510585   | 0.5723797929 |
| SNV in ATR            | 1.598545501    | 0.5726649837 |
| SUZ12 deletion        | 1.386199552    | 0.573595019  |
| PRS: MEDS_P MID3      | 0.9429416836   | 0.5737514263 |
| BCL2L12 amplification | 1.308539083    | 0.5777694117 |
| FANCB amplification   | 0.07999436792  | 0.5793568691 |
| Lab value: BASO       | 1.18097913     | 0.5793570545 |
| RASA1 deletion        | 0.7029870203   | 0.5793665297 |
| FLCN deletion         | 1.166420778    | 0.5794130618 |
| FGFR1 amplification   | 0.8151892573   | 0.579486554  |
| YAP1 amplification    | 0.5638351617   | 0.5801170596 |
| MED12 deletion        | 0.1552334262   | 0.5802466536 |
| PTPN14 deletion       | 2.114441914    | 0.5803140077 |
| Lab value: DBILI      | 2.528704847    | 0.5803973242 |
| PRS: OVCA             | 0.947836938    | 0.5813243828 |
| PMS1 deletion         | 0.7411398001   | 0.5816487613 |
| PRS: MEDS_P MID3      | 1.064154726    | 0.5816681207 |
| PRS: MEDS_P MID3      | 0.9466331133   | 0.5833074114 |
| APC deletion          | 0.8134171332   | 0.5834306688 |
| POLD1 deletion        | 1.409252665    | 0.5834338802 |
| LMO2 amplification    | 0.3713357461   | 0.5841328628 |
| ERG amplification     | 0.6097268583   | 0.586669524  |
| CALR amplification    | 0.07016401241  | 0.587508988  |
| ERBB2 deletion        | 1.289055745    | 0.5885701841 |
| PRS: PMID2786325      | 0.9457671905   | 0.5909800076 |
| HLA_B_0702            | 1.139810092    | 0.5912217736 |
| NTRK2 amplification   | 0.6816333534   | 0.5914324733 |
| Lab value: CA199C     | 1.013585751    | 0.5941240986 |
| BCORL1 amplification  | 0.4072065752   | 0.5962584941 |
| FGFR2 deletion        | 0.8463783559   | 0.5963784903 |
| RUNX1 deletion        | 0.7346194973   | 0.5978012511 |
| MSH2 amplification    | 0.7295212278   | 0.5981471989 |



|                    |                 |              |
|--------------------|-----------------|--------------|
| PRS: UKB_460K.ca   | 1.071010618     | 0.5982883464 |
| PPARG deletion     | 1.546433537     | 0.5996950656 |
| HLA_DQB1_0201      | 0.8910561489    | 0.5998764778 |
| PDCD1LG2 amplific  | 0.7929880988    | 0.6004427228 |
| PRS: PMID27863252  | 0.9420663169    | 0.6004656114 |
| BCL2 deletion      | 1.185030692     | 0.6005787358 |
| FANCF deletion     | 1.281179346     | 0.6016080406 |
| PRS: PMID27863252  | 1.055181513     | 0.6034929899 |
| IGF2 amplification | 3.044332531     | 0.605869979  |
| Lab value: TSH     | 0.9737946027    | 0.6062001033 |
| Lab value: CHOL    | 1.009974438     | 0.6074208365 |
| H19 amplification  | 3.177488504     | 0.6075398865 |
| FH amplification   | 0.8717710902    | 0.6087914722 |
| SNV in ARID2       | 1.484151145     | 0.6096116912 |
| PRS: UKB_460K.bo   | 1.062111741     | 0.6109504427 |
| WRN deletion       | 1.1427041       | 0.6145724633 |
| MEF2B deletion     | 1.316227464     | 0.615147737  |
| MCM8 deletion      | 0.72962379      | 0.615352183  |
| EPHA5 amplificati  | 0.6852613425    | 0.6155874019 |
| Lab value: MBASO   | 1.508101926     | 0.6164176284 |
| FANCI deletion     | 0.6904673223    | 0.6175168796 |
| SRC amplification  | 1.281366429     | 0.617944181  |
| SMAD2 deletion     | 1.176934702     | 0.6189084534 |
| PRS: PMID27863252  | 0.9493058291    | 0.6205465949 |
| PAXIP1 deletion    | 0.6466359186    | 0.6209912421 |
| HLA_B_5701         | 0.8225744599    | 0.622189905  |
| CSF1R amplificati  | 1.518201759     | 0.6247045196 |
| FLT3 amplification | 0.6338544172    | 0.6248942274 |
| SF3B1 deletion     | 1.356353071     | 0.6265361141 |
| Lab value: LYMPH   | 1.006285941     | 0.6281139903 |
| CCND2 amplificati  | 1.162923072     | 0.6303667251 |
| RAC1 amplification | 0.8420082372    | 0.630942074  |
| PRS: PRSWEB_PHE    | 0.9505951131    | 0.6322857822 |
| SNV in KMT2A       | 0.6171373722    | 0.6330293361 |
| HLA_B_4501         | 0.0004885550283 | 0.6340372446 |
| ZNF708 amplificati | 1.200685958     | 0.6346888338 |
| Lab value: NRBC    | 0.5939603969    | 0.6361560435 |
| COL7A1 amplificati | 0.587359212     | 0.6372195151 |
| NR0B1 deletion     | 0.2733920943    | 0.637294755  |
| ARHGAP35 deletion  | 1.330262275     | 0.6380784007 |
| KCNQ1 amplificati  | 2.720453921     | 0.6386904943 |
| PRS: TRICL.ade1.HI | 0.9466606529    | 0.640362277  |
| FAH amplification  | 1.525510205     | 0.640811819  |

|                         |                |              |
|-------------------------|----------------|--------------|
| PRS: PRSWEB_PHE         | 1.05139931     | 0.6411449162 |
| RBL2 deletion           | 0.7722444378   | 0.643035341  |
| GLI2 deletion           | 0.6580090939   | 0.6436923047 |
| PRS: MEDS_P MID3        | 1.049312694    | 0.6438673526 |
| CRTC2 amplification     | 0.8649401883   | 0.6442297838 |
| HLA_B_1801              | 0.8231449554   | 0.6445754453 |
| PRS: CD_deLange2        | 1.061206252    | 0.6458796854 |
| Lab value: AMONO        | 1.182327737    | 0.6463965072 |
| MBD4 amplification      | 0.6916820046   | 0.6476777957 |
| ZRSR2 amplification     | 0.6227799813   | 0.6483683384 |
| PRKCZ amplification     | 1.507510064    | 0.6492185744 |
| PRS: PRSWEB_PHE         | 1.046580651    | 0.6504872563 |
| PRS: UKB_460K.br        | 0.9539435636   | 0.6506309036 |
| XRCC2 deletion          | 0.6609422098   | 0.65197013   |
| HOXB13 amplification    | 0.7827359667   | 0.6521909154 |
| UBE2T deletion          | 2.01026691     | 0.6526984265 |
| FANCI amplification     | 0.7006861495   | 0.6527687045 |
| FAT1 amplification      | 0.7327094748   | 0.6535871052 |
| PRS: PRSWEB_PHE         | 1.051161275    | 0.6548624488 |
| CDKN1C amplification    | 0.3671148131   | 0.6572930394 |
| SLITRK6 amplification   | 1.335235844    | 0.6578638352 |
| MEF2B amplification     | 1.169569686    | 0.6589317564 |
| BLM amplification       | 0.7586862965   | 0.6596722083 |
| PRS: IBD_deLange2       | 0.9515871621   | 0.6609583495 |
| WHSC1 deletion          | 1.29717279     | 0.6611449666 |
| PRS: MEDS_P MID3        | 0.9503702673   | 0.6615677729 |
| FLT4 deletion           | 0.8243292176   | 0.6632966159 |
| PRS: PRSWEB_PHE         | 0.9518223736   | 0.6644948617 |
| LINC00894 amplification | 0.3369511917   | 0.6656455848 |
| DKC1 deletion           | 3.048493258    | 0.6670356018 |
| DNMT3A amplification    | 0.7576889491   | 0.6670749907 |
| SETBP1 deletion         | 1.153361773    | 0.670982803  |
| SNV in KMT2D            | 1.288485136    | 0.6711507356 |
| JAK3 deletion           | 1.286776908    | 0.6712570922 |
| PRS: ProstateCance      | 1.052283388    | 0.6714345861 |
| TMEM127 deletion        | 0.2237694801   | 0.6718253888 |
| ERCC6 deletion          | 0.8247096207   | 0.6719805155 |
| FLCN amplification      | 0.04694641351  | 0.6721174424 |
| PMS1 amplification      | 0.7917347025   | 0.6728555214 |
| GNA11 deletion          | 0.7659437818   | 0.6734659829 |
| PRS: PMID27863252       | 1.050506819    | 0.675306195  |
| SNV in ARID1B           | 2.129565057    | 0.6761470761 |
| BCL11B amplification    | 0.004864418212 | 0.6774663204 |

|                            |               |              |
|----------------------------|---------------|--------------|
| <b>BRD4 amplification</b>  | 1.154376841   | 0.6778628545 |
| <b>EXT2 amplification</b>  | 0.6920793328  | 0.6780104179 |
| <b>SMARCA4 deletion</b>    | 1.25707504    | 0.6782486948 |
| <b>WHSC1L1 amplifica</b>   | 0.7510682811  | 0.6791833483 |
| <b>ACVR1 deletion</b>      | 0.3834228359  | 0.6800198988 |
| <b>CDKN2A deletion</b>     | 0.9126743649  | 0.6807895337 |
| <b>Lab value: PTT</b>      | 1.022739029   | 0.6810327876 |
| <b>HIST1H3C deletion</b>   | 1.344432898   | 0.6813074369 |
| <b>XPA amplification</b>   | 0.7420688765  | 0.6815074374 |
| <b>AURKB deletion</b>      | 1.11472416    | 0.6821578402 |
| <b>MYCN amplification</b>  | 0.7618841481  | 0.683209428  |
| <b>PDGFRA amplificati</b>  | 0.8198535838  | 0.6836534877 |
| <b>UIMC1 amplification</b> | 1.25182875    | 0.6844844436 |
| <b>SNV in STK11</b>        | 1.295283482   | 0.6850582892 |
| <b>PRS: PRSWEB_PHE</b>     | 0.9609630792  | 0.6860253773 |
| <b>SNV in TP53</b>         | 0.8855354241  | 0.6865909235 |
| <b>GEN1 deletion</b>       | 0.2794955832  | 0.6876137644 |
| <b>SERPINA1 amplifica</b>  | 0.3841481823  | 0.6896587117 |
| <b>PRS: UKB_460K.pig</b>   | 0.9516588807  | 0.6899628246 |
| <b>CIITA deletion</b>      | 0.7810141647  | 0.6925428379 |
| <b>KEAP1 deletion</b>      | 0.7141079399  | 0.6928128401 |
| <b>PRS: TRICL.ade_s.H</b>  | 0.9542215169  | 0.6930176275 |
| <b>MLH3 amplification</b>  | 1.670753318   | 0.6941790145 |
| <b>RAD52 amplification</b> | 0.7706634452  | 0.6954413232 |
| <b>ID4 amplification</b>   | 0.8438287415  | 0.6970021379 |
| <b>HELQ deletion</b>       | 1.271790105   | 0.6972815555 |
| <b>PRS: PMID28067908</b>   | 0.9375001177  | 0.698037036  |
| <b>PRS: PMID28067908</b>   | 0.9375001177  | 0.698037036  |
| <b>PRS: PMID28067908</b>   | 0.9375001177  | 0.698037036  |
| <b>TCF3 amplification</b>  | 1.154645396   | 0.698815139  |
| <b>FANCE deletion</b>      | 0.7537678646  | 0.6989583015 |
| <b>PRS: UKB_460K.dis</b>   | 1.044975652   | 0.699382249  |
| <b>PRS: MEDS_PMD3</b>      | 1.042946878   | 0.69975299   |
| <b>BABAM1 amplificati</b>  | 0.06283391301 | 0.7000429234 |
| <b>SRC deletion</b>        | 3211.65304    | 0.7026017386 |
| <b>NPRL3 amplification</b> | 0.2465269501  | 0.7030356507 |
| <b>HIST1H3B deletion</b>   | 1.33888702    | 0.7036132023 |
| <b>CREBBP amplificati</b>  | 1.243899388   | 0.7058989198 |
| <b>RBM10 amplificatio</b>  | 0.2240182886  | 0.7061676285 |
| <b>PRS: TRICL.sma_s.f</b>  | 1.044963443   | 0.7066468788 |
| <b>HRAS amplification</b>  | 1.307184252   | 0.7099126796 |
| <b>Lab value: ALYMPH</b>   | 1.063676091   | 0.710564752  |
| <b>Lab value: AEOS</b>     | 1.385912906   | 0.7125144526 |

|                      |              |              |
|----------------------|--------------|--------------|
| Lab value: URIC      | 0.9004774116 | 0.7137374941 |
| KDM5A amplification  | 0.7811970939 | 0.7144143469 |
| USP8 amplification   | 0.536963194  | 0.7153369179 |
| PRS: GSCAN.Cigarette | 0.9603401247 | 0.7154519392 |
| VEGFA deletion       | 1.331224453  | 0.716039656  |
| CTCF deletion        | 0.8222708059 | 0.7168969272 |
| WT1 deletion         | 1.194158023  | 0.718865296  |
| RHOA amplification   | 0.5867622208 | 0.7208358467 |
| FLT1 amplification   | 0.7213293314 | 0.7209644275 |
| KDR amplification    | 0.8372063149 | 0.721113837  |
| SNV in PRKDC         | 1.219729527  | 0.7218359396 |
| RNF8 deletion        | 1.33583999   | 0.7220494406 |
| SOCS1 amplification  | 1.224581189  | 0.7221183483 |
| GNB2L1 deletion      | 1.225746476  | 0.7222252183 |
| PRS: UKB_460K.blocks | 1.03226687   | 0.7231884638 |
| Lab value: UPH       | 1.114338516  | 0.7233351249 |
| RAD50 amplification  | 1.292170478  | 0.7235129125 |
| PRS: PRSWEB_PHE      | 1.042148243  | 0.7241807996 |
| JAK2 amplification   | 0.8617751235 | 0.724189751  |
| FANCC amplification  | 0.7932402968 | 0.7244112742 |
| RAC1 deletion        | 0.2901411207 | 0.7247421576 |
| PIK3R1 deletion      | 1.130307537  | 0.7265721124 |
| BCL2L1 amplification | 1.121637586  | 0.7283363985 |
| HLA_A_3201           | 1.177433997  | 0.7284706704 |
| MUTYH deletion       | 0.8591873735 | 0.7290501547 |
| Lab value: SQUAM     | 1.102033153  | 0.7291775201 |
| CDKN1C deletion      | 0.8567196723 | 0.7295263478 |
| Lab value: EOS       | 1.024214219  | 0.7310265939 |
| ABCB11 amplification | 0.6589230184 | 0.7310619151 |
| Lab value: PHOS      | 0.8311406374 | 0.7317363956 |
| TSHR amplification   | 1.972827906  | 0.7324556065 |
| HLA_A_0301           | 0.9262468066 | 0.7329761769 |
| CTNNB1 amplification | 1.213719281  | 0.7378251478 |
| BCL2L12 deletion     | 0.8560702434 | 0.7386647455 |
| KCNIP1 amplification | 1.31706179   | 0.7388373365 |
| NRAS deletion        | 0.8652547688 | 0.7405484237 |
| Lab value: FRT4      | 1.780479016  | 0.7410180065 |
| NFKBIE deletion      | 1.298518641  | 0.7416984115 |
| MYCN deletion        | 0.759519667  | 0.7452575621 |
| XPC deletion         | 0.8735005062 | 0.746331173  |
| Lab value: FRT3      | 0.7964095113 | 0.7471705187 |
| DNMT3A deletion      | 0.7751389764 | 0.7497821758 |
| GNA11 amplification  | 0.8887338265 | 0.751027718  |

|                       |                 |              |
|-----------------------|-----------------|--------------|
| PIK3C2B amplification | 0.9212567589    | 0.7525092868 |
| KMT2D deletion        | 0.7536753558    | 0.7536727773 |
| LMO1 amplification    | 0.5904118965    | 0.7553863899 |
| POLH deletion         | 1.278973793     | 0.7554206343 |
| PRS: PRSWEB_PHE       | 0.9670779338    | 0.7559229143 |
| EGFR amplification    | 0.9146065707    | 0.7566605721 |
| CIITA amplification   | 1.123256704     | 0.7602264065 |
| PRS: UKB_460K.bl      | 1.034378465     | 0.7609321143 |
| HFE deletion          | 1.263876231     | 0.7631490579 |
| IKZF1 deletion        | 1.278744385     | 0.7634026585 |
| Lab value: PLCO2      | 1.014115876     | 0.7643091492 |
| SNV in POLQ           | 1.68600881      | 0.7650683504 |
| PRS: TRICL.all.HM3    | 1.036270307     | 0.7658563578 |
| PRS: UKB_460K.oth     | 1.033992228     | 0.7663704859 |
| Lab value: PNA        | 1.011881226     | 0.7666403903 |
| HLA_C_0702            | 1.070911259     | 0.7670835421 |
| SNV in COL7A1         | 1.623427521     | 0.7697495741 |
| ETV6 deletion         | 1.127213122     | 0.7705220015 |
| KAT6A amplification   | 0.8467717306    | 0.7709535027 |
| PRS: MEDS_PMD3        | 1.031069377     | 0.7716958401 |
| JAZF1 amplification   | 0.8951450483    | 0.7717601026 |
| CDK1 amplification    | 0.0009070566823 | 0.7718593615 |
| KRAS amplification    | 1.082230114     | 0.7733126534 |
| CBFA2T3 deletion      | 0.8763763716    | 0.7772260771 |
| MDM2 deletion         | 1.188180294     | 0.7781245686 |
| PRKCI amplification   | 0.9224818759    | 0.7788111355 |
| HLA_DPB1_0201         | 1.085159518     | 0.7815486517 |
| HLA_B_4001            | 1.098570375     | 0.7826114107 |
| FOXL2 deletion        | 0.8498883004    | 0.7851527751 |
| CASP8 amplification   | 1.209774284     | 0.7863285838 |
| PRS: UKB_460K.bl      | 1.033809738     | 0.7865076311 |
| B2M deletion          | 0.9146839559    | 0.7874174506 |
| AURKA amplification   | 1.082997683     | 0.7878114814 |
| NEIL2 amplification   | 0.8138732241    | 0.7881837412 |
| NBN deletion          | 0.7986906785    | 0.789526348  |
| ERCC5 deletion        | 0.8887075397    | 0.789649342  |
| CTLA4 amplification   | 0.8346163579    | 0.7899948324 |
| RFWD2 deletion        | 1.455295927     | 0.790569485  |
| MLH3 deletion         | 1.173435678     | 0.7921566288 |
| BCL6 amplification    | 1.07650384      | 0.7927261047 |
| ETV6 amplification    | 1.090748793     | 0.7928044278 |
| PRS: PRSWEB_PHE       | 0.9709849928    | 0.7936519634 |
| PRSS1 deletion        | 1.186748096     | 0.7952568224 |

|                             |              |              |
|-----------------------------|--------------|--------------|
| <b>U2AF1 deletion</b>       | 1.161155282  | 0.7961987205 |
| <b>NPM1 deletion</b>        | 1.12149267   | 0.7963640868 |
| <b>SNV in EP300</b>         | 0.6747685896 | 0.7977906192 |
| <b>OGG1 deletion</b>        | 1.222779221  | 0.79783618   |
| <b>HLA_DQA1_0301</b>        | 1.060678624  | 0.7981214044 |
| <b>CCND2 deletion</b>       | 0.8971887999 | 0.7984005272 |
| <b>Lab value: HCT</b>       | 1.00571482   | 0.7987651132 |
| <b>SH2D1A deletion</b>      | 0.5243336547 | 0.7991119367 |
| <b>ABCB11 deletion</b>      | 0.5710032208 | 0.8010108837 |
| <b>FKBP9 amplification</b>  | 0.8781421825 | 0.8018780209 |
| <b>GLI3 amplification</b>   | 0.8749251203 | 0.8024278671 |
| <b>PIK3CA amplification</b> | 0.93158975   | 0.8029398425 |
| <b>POLB amplification</b>   | 0.8671041847 | 0.8051507106 |
| <b>SNV in BRCA1</b>         | 1.110440111  | 0.8053805931 |
| <b>MECOM amplification</b>  | 0.9357377738 | 0.8074712842 |
| <b>STAT6 deletion</b>       | 1.151166944  | 0.8075271937 |
| <b>CDK6 deletion</b>        | 0.7982994302 | 0.8094470451 |
| <b>PRS: MEDS_P MID3</b>     | 0.9712453767 | 0.8101408809 |
| <b>PRS: MEDS_P MID3</b>     | 1.025847127  | 0.8101920595 |
| <b>LMO3 amplification</b>   | 1.090639994  | 0.8102139086 |
| <b>MAP2K4 deletion</b>      | 1.068317438  | 0.8110900234 |
| <b>PRS: PRSWEB_PHE</b>      | 0.9741595436 | 0.8119883527 |
| <b>CRTC2 deletion</b>       | 1.602940656  | 0.8120800306 |
| <b>ERG deletion</b>         | 1.213684033  | 0.8121897937 |
| <b>RAF1 amplification</b>   | 1.118919705  | 0.8122122179 |
| <b>ACVR1 amplification</b>  | 1.229111016  | 0.8127713964 |
| <b>NRG1 deletion</b>        | 0.9101364037 | 0.8129745947 |
| <b>Lab value: RETCP</b>     | 1.829705071  | 0.814489402  |
| <b>PRS: PMID27863252</b>    | 0.9705846162 | 0.814781847  |
| <b>MYC deletion</b>         | 0.6760600359 | 0.8148164289 |
| <b>RFWD2 amplification</b>  | 1.07501738   | 0.8154463049 |
| <b>RHOH amplification</b>   | 1.225272086  | 0.8167458296 |
| <b>Lab value: MCH</b>       | 1.010170846  | 0.8186534766 |
| <b>ERCC3 deletion</b>       | 0.832612745  | 0.8209795257 |
| <b>SDHA amplification</b>   | 1.081916424  | 0.82225106   |
| <b>Lab value: TBILI</b>     | 0.9361569788 | 0.822768435  |
| <b>PRS: UKB_460K.dis</b>    | 1.024860619  | 0.822943161  |
| <b>CTNNA1 amplification</b> | 1.18261966   | 0.8245444123 |
| <b>POLB deletion</b>        | 0.9063899223 | 0.8254342312 |
| <b>REL amplification</b>    | 0.9059714185 | 0.8257026731 |
| <b>PRS: UKB_460K.dis</b>    | 1.023225441  | 0.8260880137 |
| <b>PRS: PRSWEB_PHE</b>      | 1.02612489   | 0.8271195622 |
| <b>SERPINA1 deletion</b>    | 1.147698705  | 0.8279569912 |

|                             |              |              |
|-----------------------------|--------------|--------------|
| <b>PRAME deletion</b>       | 1.1358027    | 0.8286819105 |
| <b>PRS: PRSWEB_PHE</b>      | 1.023231382  | 0.8292229184 |
| <b>PRS: PRSWEB_PHE</b>      | 1.022409033  | 0.8293603064 |
| <b>CDKN2B deletion</b>      | 0.9530909663 | 0.8312876928 |
| <b>TSC2 amplification</b>   | 1.129639418  | 0.8314362934 |
| <b>CD274 amplification</b>  | 1.078577475  | 0.8315159454 |
| <b>FAM46C deletion</b>      | 1.094502507  | 0.8324043525 |
| <b>PRS: PMID27863252</b>    | 0.9767397593 | 0.8336503845 |
| <b>PRS: UC_deLange2</b>     | 1.023680353  | 0.8339470234 |
| <b>FGFR2 amplification</b>  | 0.8445939477 | 0.8347988133 |
| <b>HELQ amplification</b>   | 0.4589264876 | 0.8362505474 |
| <b>PPARG amplification</b>  | 1.142344767  | 0.8374108158 |
| <b>CIC deletion</b>         | 0.585136413  | 0.8375720232 |
| <b>SETD2 deletion</b>       | 1.065609869  | 0.8411000272 |
| <b>PRS: Asthma.age_o</b>    | 0.9766632843 | 0.841874855  |
| <b>PRS: PMID27863252</b>    | 1.022948496  | 0.8418806835 |
| <b>SLC34A2 deletion</b>     | 1.118750717  | 0.842183371  |
| <b>MTA1 deletion</b>        | 1.135165829  | 0.8424067517 |
| <b>PRS: GSCAN.Smoki</b>     | 1.021328075  | 0.8447288379 |
| <b>OGG1 amplification</b>   | 0.8385040152 | 0.8448666823 |
| <b>KIT amplification</b>    | 0.9196917123 | 0.8453269216 |
| <b>SDHA deletion</b>        | 0.8912342783 | 0.8460030867 |
| <b>Lab value: MCHC</b>      | 0.976061677  | 0.8460668845 |
| <b>DICER1 deletion</b>      | 1.066390572  | 0.8467341975 |
| <b>PRS: UKB_460K.imp</b>    | 0.9789487335 | 0.8479490512 |
| <b>FANCL amplification</b>  | 0.9011988022 | 0.8480527711 |
| <b>Lab value: MAMON</b>     | 1.409754077  | 0.8480608472 |
| <b>FOXA1 deletion</b>       | 1.178205792  | 0.8483553745 |
| <b>RELA deletion</b>        | 1.348990876  | 0.8499241248 |
| <b>PRS: MEDS_P MID3</b>     | 0.9725226259 | 0.8502774654 |
| <b>PRS: UKB_460K.car</b>    | 0.9782582745 | 0.8503620313 |
| <b>ELANE amplification</b>  | 0.6878713428 | 0.850555612  |
| <b>DICER1 amplification</b> | 1.123631076  | 0.8511850109 |
| <b>GNAS amplification</b>   | 1.057692587  | 0.8514664635 |
| <b>HLA_C_0602</b>           | 1.052179743  | 0.8518722001 |
| <b>NPM1 amplification</b>   | 1.077401312  | 0.851998235  |
| <b>PRS: MEDS_P MID3</b>     | 1.021092307  | 0.8524344085 |
| <b>HLA_A_6802</b>           | 1.369006682  | 0.8533779039 |
| <b>MAX amplification</b>    | 0.8677412208 | 0.853625169  |
| <b>PRS: UKB_460K.dis</b>    | 0.9775080202 | 0.8545168319 |
| <b>CADM2 amplification</b>  | 0.6414549286 | 0.8546550838 |
| <b>TRAF3 deletion</b>       | 1.121966603  | 0.8552981074 |
| <b>RECQL4 deletion</b>      | 0.6794739592 | 0.8554282464 |

|                       |              |              |
|-----------------------|--------------|--------------|
| CRTC1 amplification   | 1.068625373  | 0.855900989  |
| PRS: UKB_460K.dis     | 1.022015259  | 0.8559349979 |
| MLH1 deletion         | 0.9381553603 | 0.8564322591 |
| RAD51 amplification   | 1.296218774  | 0.8571125726 |
| TET1 amplification    | 0.6641668475 | 0.8573197803 |
| FAS deletion          | 0.9456473437 | 0.8575612224 |
| SBDS amplification    | 0.9414353131 | 0.8581314583 |
| PTCH1 amplification   | 0.8873606301 | 0.8583013815 |
| RHOT1 deletion        | 1.177839824  | 0.8593048907 |
| FAM175A amplification | 0.5006545553 | 0.8614629797 |
| GLI1 deletion         | 1.102111319  | 0.8614774198 |
| HLA_A_6801            | 1.080708863  | 0.8620239844 |
| PRS: MEDS_P MID3      | 1.020016145  | 0.8625851102 |
| CDH4 amplification    | 0.9138193963 | 0.8626849048 |
| PRS: UKB_460K.dis     | 1.02187455   | 0.863393788  |
| GNAQ amplification    | 0.8876018341 | 0.8640882666 |
| DIS3L2 amplification  | 0.8526820852 | 0.8646509686 |
| PRS: UKB_460K.dis     | 1.019316646  | 0.8651448179 |
| HLA_A_2601            | 1.086897663  | 0.8652625584 |
| PALB2 amplification   | 0.8796065247 | 0.8661124616 |
| PTK2 deletion         | 0.6810072686 | 0.8663291756 |
| KAT6B amplification   | 1.157956781  | 0.8663664765 |
| FANCM amplification   | 1.118554811  | 0.8666806243 |
| SMARCA4 amplification | 1.060414717  | 0.8671163273 |
| KAT6A deletion        | 0.9292588306 | 0.8686345337 |
| STK11 amplification   | 0.9429098537 | 0.8687540855 |
| PIK3R1 amplification  | 1.121106562  | 0.8704065623 |
| HLA_DRB1_0404         | 1.124991749  | 0.8720665595 |
| MUS81 deletion        | 1.292039243  | 0.8720837655 |
| ARAF deletion         | 0.6592663846 | 0.8742648112 |
| EXT1 deletion         | 1.244611239  | 0.8758664195 |
| CDK5 amplification    | 0.9343096315 | 0.8760113083 |
| ARID2 deletion        | 0.9159036176 | 0.876060842  |
| PRS: PRSWEB_PHE       | 0.979767746  | 0.8768666727 |
| ERCC2 amplification   | 1.056650288  | 0.8804448185 |
| TMPRSS2 amplification | 0.9137962617 | 0.8807886415 |
| DAXX deletion         | 1.132465665  | 0.8811471502 |
| HLA_DQB1_0302         | 1.040485877  | 0.8828525726 |
| PRS: PMID27863252     | 0.9842105236 | 0.8846694223 |
| GREM1 deletion        | 0.9352296985 | 0.8851730902 |
| CDH1 amplification    | 1.073817231  | 0.8853653053 |
| ERCC4 amplification   | 1.081642513  | 0.8857412982 |
| PRS: UKB_460K.me      | 1.016919267  | 0.8857901548 |



|                     |              |              |
|---------------------|--------------|--------------|
| HLA_A_1101          | 0.944176739  | 0.8861528674 |
| RAD21 deletion      | 0.7627852566 | 0.8878771864 |
| PRS: UKB_460K.lun   | 1.017045761  | 0.889781711  |
| DCLRE1C amplifica   | 1.122758262  | 0.8898736935 |
| IKZF1 amplification | 0.9580918318 | 0.8900404374 |
| MPL deletion        | 1.060891152  | 0.8914886167 |
| PRS: UKB_460K.rep   | 1.018078208  | 0.8923595428 |
| PRS: UKB_460K.pig   | 1.016501719  | 0.8955980173 |
| SOS1 amplification  | 0.9132156477 | 0.8963083235 |
| FANCM deletion      | 1.114908499  | 0.8963466733 |
| HLA_B_1302          | 0.9205037981 | 0.8966658671 |
| RHPN2 amplificatio  | 0.9404668167 | 0.8967941771 |
| BAP1 deletion       | 1.042145599  | 0.8980491607 |
| FGFR3 amplification | 0.9378618459 | 0.8984243793 |
| PRS: Stratified_fem | 0.9841052464 | 0.8989845937 |
| CXCR4 deletion      | 0.8166517216 | 0.8993023653 |
| GATA2 amplification | 1.080101623  | 0.9000427566 |
| TET2 amplification  | 1.117142207  | 0.9000695078 |
| PRS: UKB_460K.bo    | 0.9852123008 | 0.9011296014 |
| Lab value: PCL      | 1.004138976  | 0.9041233345 |
| DOCK8 deletion      | 0.9586818551 | 0.9048523751 |
| GATA4 deletion      | 0.9692712284 | 0.906660159  |
| Lab value: USPG     | 49.89897742  | 0.9100286331 |
| TP53 deletion       | 1.030132137  | 0.9105712917 |
| MGA amplification   | 1.176580437  | 0.9111489718 |
| TCF7L2 amplificatio | 0.909634789  | 0.9119864744 |
| TMPRSS2 deletion    | 1.100669571  | 0.9124427083 |
| PRS: MEDS_P MID3    | 1.013905816  | 0.9128909341 |
| PRS: TRICL.sqc_s.H  | 1.01549496   | 0.9132008442 |
| CDK8 amplification  | 0.8852453463 | 0.9139687841 |
| WHSC1L1 deletion    | 0.9552579876 | 0.9141132813 |
| PRS: PMID27863252   | 0.9886818225 | 0.9151607652 |
| AXIN2 deletion      | 1.103871686  | 0.9171141415 |
| PRS: PRSWEB_PHE     | 1.01109454   | 0.9177487393 |
| PRS: Asthma.childr  | 0.9866831645 | 0.9178051725 |
| HLA_DQB1_0402       | 0.8822900064 | 0.9182607996 |
| PRS: UKB_460K.bo    | 1.0109969    | 0.9186430515 |
| PRS: UKB_460K.rep   | 1.01255359   | 0.9187849823 |
| CARD11 amplificati  | 1.026882206  | 0.920559039  |
| RINT1 deletion      | 1.109003559  | 0.9210333    |
| PML amplification   | 1.111524354  | 0.9218438752 |
| CXCR4 amplificatio  | 0.7977341388 | 0.9225179943 |
| Lab value: HGB      | 1.005999533  | 0.9232369657 |

|                           |              |              |
|---------------------------|--------------|--------------|
| <b>ERBB3 deletion</b>     | 0.9454188693 | 0.9236397072 |
| <b>TFE3 amplification</b> | 1.212860534  | 0.9242402103 |
| <b>Lab value: ANION</b>   | 1.006630782  | 0.9244927867 |
| <b>PRS: PRSWEB_PHE</b>    | 0.9902563101 | 0.9245261871 |
| <b>PRS: UKB_460K.pig</b>  | 0.988785433  | 0.9251329382 |
| <b>MYD88 deletion</b>     | 0.9678321507 | 0.9258786039 |
| <b>Lab value: RDW</b>     | 0.9956179122 | 0.9275528667 |
| <b>Lab value: RBC</b>     | 1.016444942  | 0.9276385994 |
| <b>PTK2B deletion</b>     | 1.035127667  | 0.927737634  |
| <b>PNRC1 amplificatio</b> | 0.9421724306 | 0.9277756897 |
| <b>XRCC3 deletion</b>     | 1.058000615  | 0.9283064766 |
| <b>XPC amplification</b>  | 1.044343031  | 0.928380255  |
| <b>Lab value: WBC</b>     | 1.003233158  | 0.9292914297 |
| <b>EP300 deletion</b>     | 1.04059046   | 0.9293436358 |
| <b>PRS: PRSWEB_PHE</b>    | 0.9901162172 | 0.929489311  |
| <b>PRS: X25HydroxyVit</b> | 0.9867066137 | 0.929634423  |
| <b>HLA_B_2705</b>         | 1.050157231  | 0.9302007918 |
| <b>TERT deletion</b>      | 0.9601511187 | 0.9312546804 |
| <b>FAN1 deletion</b>      | 1.041533464  | 0.9312626473 |
| <b>HLA_A_2501</b>         | 1.064971934  | 0.9312940204 |
| <b>RSPO2 deletion</b>     | 0.7788751325 | 0.9316568253 |
| <b>FUS amplification</b>  | 0.9533883127 | 0.9330640406 |
| <b>XRCC1 deletion</b>     | 0.8721804247 | 0.9346384082 |
| <b>FBXW7 deletion</b>     | 1.03024272   | 0.9350180911 |
| <b>MAFB amplification</b> | 1.039796409  | 0.9368976229 |
| <b>LMO2 deletion</b>      | 0.9602970199 | 0.9386807464 |
| <b>PTK2B amplificatio</b> | 1.060524203  | 0.9387134098 |
| <b>HLA_B_5501</b>         | 0.9529822168 | 0.9388820296 |
| <b>CASP8 deletion</b>     | 1.186006329  | 0.939147981  |
| <b>PRS: UKB_460K.dis</b>  | 0.991839716  | 0.9410934955 |
| <b>ETV5 amplification</b> | 0.9805125387 | 0.9425076061 |
| <b>CDKN2C deletion</b>    | 0.9722553525 | 0.9431604443 |
| <b>PIM1 deletion</b>      | 1.050298212  | 0.9433692363 |
| <b>PRS: MEDS_P MID3</b>   | 1.007959765  | 0.9434872195 |
| <b>PRS: PMID27863252</b>  | 0.9928799005 | 0.9443774613 |
| <b>MCM8 amplificatio</b>  | 0.9523068509 | 0.9446426599 |
| <b>PRS: PRSWEB_PHE</b>    | 0.9928907689 | 0.9455508489 |
| <b>WAS amplification</b>  | 1.143779377  | 0.9461718757 |
| <b>NOTCH2 deletion</b>    | 1.0327587    | 0.9462624285 |
| <b>BRCC3 deletion</b>     | 0.8479509128 | 0.9472904566 |
| <b>PRS: PRSWEB_PHE</b>    | 1.007008544  | 0.9475741129 |
| <b>GALNT12 amplificat</b> | 1.052871444  | 0.9484675007 |
| <b>ERCC3 amplificatio</b> | 0.9465802652 | 0.9490746485 |

|                       |              |              |
|-----------------------|--------------|--------------|
| ERBB4 amplification   | 1.046139216  | 0.9498103085 |
| CDKN1A deletion       | 0.9572393461 | 0.9511647825 |
| ROS1 amplification    | 1.037330267  | 0.952085043  |
| TP53BP1 amplification | 0.9086419426 | 0.953019076  |
| HLA_DPB1_0401         | 1.01102774   | 0.9533150429 |
| HLA_B_3801            | 0.9657659762 | 0.9534384333 |
| LIG4 deletion         | 1.039169356  | 0.9545427461 |
| FGFR4 deletion        | 1.022251565  | 0.9558034848 |
| CRKL deletion         | 1.027761725  | 0.9561657938 |
| HLA_C_1203            | 1.017811158  | 0.9572343143 |
| DDB1 deletion         | 0.9017106886 | 0.9584762643 |
| PRS: TRICL.sqc_ns     | 1.006422957  | 0.9588598321 |
| PRS: PRSWEB_PHE       | 1.005413486  | 0.9609496517 |
| TFE3 deletion         | 1.236337867  | 0.961256813  |
| WAS deletion          | 1.236337867  | 0.961256813  |
| ERCC5 amplification   | 0.9794591705 | 0.9622038461 |
| JAK3 amplification    | 0.983489919  | 0.9623304233 |
| SQSTM1 amplification  | 0.9727597252 | 0.9626838868 |
| CD79B deletion        | 1.040727525  | 0.963176758  |
| PRS: UKB_460K.dis     | 0.9937640441 | 0.9634619015 |
| PRS: MEDS_P MID3      | 1.005431894  | 0.9634964093 |
| FGFR3 deletion        | 0.9797652367 | 0.9642436164 |
| NEIL2 deletion        | 0.9833653187 | 0.9653591837 |
| SNV in MGA            | 0.8810024004 | 0.9660283411 |
| PRS: PMID27863252     | 0.9957154121 | 0.9660345909 |
| PRS: TRICL.ade1_s     | 1.005172127  | 0.9662163906 |
| BRD4 deletion         | 1.028261243  | 0.9679296962 |
| Lab value: DMANUT     | 0.9950376721 | 0.9679735419 |
| PRS: PMID27863252     | 0.9949741607 | 0.9691883538 |
| POLD1 amplification   | 0.9695343327 | 0.9706371056 |
| AKT1 deletion         | 0.9878851725 | 0.9724581222 |
| FANCA amplification   | 0.9757392811 | 0.9735522011 |
| PBRM1 deletion        | 0.9890473518 | 0.9738792719 |
| Lab value: ANEUT      | 0.9984341336 | 0.9740599929 |
| QKI deletion          | 1.009683417  | 0.9747382126 |
| BCL11B deletion       | 1.019066003  | 0.9761271058 |
| PRS: GSCAN.Smoki      | 0.9968347461 | 0.9769677884 |
| NRG1 amplification    | 0.9783910664 | 0.9780479073 |
| STK11 deletion        | 1.013344112  | 0.9785940132 |
| DIS3 deletion         | 0.9896211661 | 0.9790869234 |
| DDB2 deletion         | 0.9871682522 | 0.9794243105 |
| PRS: PRSWEB_PHE       | 0.9972161363 | 0.9796718144 |
| CCND3 deletion        | 0.9801229889 | 0.9799068865 |

|                    |              |              |
|--------------------|--------------|--------------|
| Lab value: PK      | 1.008492781  | 0.9802235491 |
| SNV in CREBBP      | 1.01987343   | 0.9816829083 |
| PRS: UKB_460K.blo  | 0.997840337  | 0.9831493676 |
| PRS: UKB_460K.cov  | 0.9972730873 | 0.9834955395 |
| PRS: TRICL.smoker  | 0.9977510042 | 0.9843790908 |
| PRS: PRSWEB_PHE    | 0.9981591882 | 0.9864028363 |
| RBM10 deletion     | 1.077440162  | 0.9864123903 |
| HLA_A_2301         | 1.005499337  | 0.9899979977 |
| PRS: PRSWEB_PHE    | 0.9986267771 | 0.990026711  |
| CTLA4 deletion     | 1.029057733  | 0.9901551282 |
| PRS: UKB_460K.dis  | 0.9988039266 | 0.9912128252 |
| PHOX2B deletion    | 1.004834881  | 0.9916671588 |
| CBLB amplification | 1.003719273  | 0.9920268895 |
| CTNNB1 deletion    | 0.9969669751 | 0.992889449  |
| TAZ deletion       | 1.021980304  | 0.9929292481 |
| NTRK1 deletion     | 1.011562655  | 0.9930403156 |
| PRS: UKB_460K.blo  | 0.9991668495 | 0.9944127287 |
| PRS: PRSWEB_PHE    | 0.9992649344 | 0.9946009711 |
| SLC34A2 amplificat | 1.005635564  | 0.9950440776 |
| EPHA5 deletion     | 1.002364646  | 0.9958365143 |
| ASXL1 amplificator | 1.001288142  | 0.9969929254 |
| AKT2 amplification | 1.000996708  | 0.9976540872 |
| SLC25A13 deletion  | 1.002809485  | 0.9978765417 |
| Lab value: LIPASE  | 1.000025315  | 0.9985065475 |
| MED12 amplificatio | 0.7247086996 | 0.9992168184 |
| LINC00894 deletion | 0.3793687701 | 0.9994770059 |
| SNV in STAG2       | 0.4685790378 | 0.9998049289 |
| CSF1R deletion     | 0.9998719684 | 0.9998238112 |
| AURKB amplificatio | 0.6827227119 | 0.9998480575 |
| GBA deletion       | 0.52536077   | 0.9998524322 |
| AR amplification   | 0.8188294093 | 0.9999173731 |
| RIT1 deletion      | 0.1809994975 | 0.9999200459 |
| PVRL4 deletion     | 0.2007445671 | 0.9999781239 |

| <b>Search terms</b>              | <b>Restriction of results</b>           |
|----------------------------------|-----------------------------------------|
| due to antineoplastic therapy    | glucocorticoids and synthetic analogues |
| allergic reaction to drug        | anemia                                  |
| adverse effect                   | hepatitis c                             |
| toxic                            | immunosuppressive                       |
| autoimmune                       | infectious                              |
| drug-induced                     | anticoagulants                          |
| hepatitis                        | due to inhalation of food and vomit     |
| endocrinopathy                   | insomnia                                |
| nephritis                        | constipation                            |
| pancreatitis                     | monitoring                              |
| uveitis                          | diagnostic agents                       |
| musculoskeletal                  | opium                                   |
| carditis                         | opioid                                  |
| cystitis                         | pancytopenia                            |
| arthritis                        | without complication                    |
| adrenal insufficiency            | leukopenia                              |
| mucositis                        | agranulocytosis                         |
| myositis                         | clostridium difficile                   |
| pruritis                         | without esophagitis                     |
| sialadenitis                     | fever                                   |
| bronchiolitis                    | non-steroid                             |
| myocarditis                      | malignant                               |
| ketoacidosis                     | nontoxic                                |
| colitis                          | chemo                                   |
| pneumonitis                      | radi                                    |
| dermatitis                       | chronic                                 |
| neuropathy                       | cancer                                  |
| hypothyroidism due to medication | nodule                                  |
| hypothyroidism due to medication | history                                 |
|                                  | contact                                 |
|                                  | melanoma                                |
|                                  | infection                               |
|                                  | test                                    |
|                                  | cyst                                    |
|                                  | antibody                                |
|                                  | viral                                   |
|                                  | bacteria                                |
|                                  | noninflammatory                         |
